# Supplementary material for: Polyacetylenes from the Roots of Swietenia macrophylla King
Source: PubMed Central journal article supplement (PMC6480581; doi:10.3390/molecules24071291), 2019-04-02
Supplement: molecules-24-01291-s001.pdf [file molecules-24-01291-s001.pdf]

# Polyacetylenes from the roots of *Swietenia macrophylla* King

Cheng-Neng Mi <sup>1,2</sup>, Hao Wang <sup>1</sup>, Hui-Qin Chen <sup>1</sup>, Cai-Hong Cai <sup>1</sup>, Shao-Peng Li <sup>2</sup>, Wen-Li Mei <sup>1,\*</sup> and Hao-Fu Dai <sup>1,\*</sup>

<sup>1</sup> Key Laboratory of Biology and Genetic Resources of Tropical Crops, Ministry of Agriculture, Institute of Tropical Bioscience and Biotechnology, Chinese Academy of Tropical Agricultural Sciences, 571101, Haikou, PR China; michengnengnpc@126.com (C.-N.M.); wanghao@itbb.or.cn (H.W.); chenhuiqin@itbb.or.cn (H.-Q.C.); caicaihong@itbb.or.cn (C.-H.C.); meiwenli@itbb.or.cn (W.-L.M.); daihaofu@itbb.or.cn (H.-F.D.)

<sup>2</sup> Institute of Tropical Agriculture and Forestry, Hainan University, Haikou 570228, PR China; lisp555@126.com (S.-P.L.)

\* Correspondence: meiwenli@itbb.org.cn (W.-L.M.); daihaofu@itbb.org.cn (H.-F.D.); Tel.: +86-898-6698-7529 (W.-L.M.); +86-898-6696-1869 (H.-F.D.)

## Table of Content

|                                                                                                            |    |
|------------------------------------------------------------------------------------------------------------|----|
| <b>Figure S1.</b> $^1\text{H}$ NMR spectrum (500 MHz) of compound <b>1</b> in $\text{CDCl}_3$ .....        | 3  |
| <b>Figure S2.</b> $^{13}\text{C}$ NMR spectrum (125 MHz) of compound <b>1</b> in $\text{CDCl}_3$ .....     | 4  |
| <b>Figure S3.</b> $^1\text{H}$ - $^1\text{H}$ COSY spectrum of compound <b>1</b> in $\text{CDCl}_3$ .....  | 5  |
| <b>Figure S4.</b> HSQC spectrum of compound <b>1</b> in $\text{CDCl}_3$ .....                              | 6  |
| <b>Figure S5.</b> HMBC spectrum of compound <b>1</b> in $\text{CDCl}_3$ .....                              | 7  |
| <b>Figure S6.</b> ROESY spectrum of compound <b>1</b> in $\text{CDCl}_3$ .....                             | 8  |
| <b>Figure S7.</b> HRESI(+)MS spectrum of compound <b>1</b> .....                                           | 9  |
| <b>Figure S8.</b> $^1\text{H}$ NMR spectrum (500 MHz) of compound <b>2</b> in $\text{CDCl}_3$ .....        | 10 |
| <b>Figure S9.</b> $^{13}\text{C}$ NMR spectrum (125 MHz) of compound <b>2</b> in $\text{CDCl}_3$ .....     | 11 |
| <b>Figure S10.</b> $^1\text{H}$ - $^1\text{H}$ COSY spectrum of compound <b>2</b> in $\text{CDCl}_3$ ..... | 12 |
| <b>Figure S11.</b> HSQC spectrum of compound <b>2</b> in $\text{CDCl}_3$ .....                             | 13 |
| <b>Figure S12.</b> HMBC spectrum of compound <b>2</b> in $\text{CDCl}_3$ .....                             | 14 |
| <b>Figure S13.</b> ROESY spectrum of compound <b>2</b> in $\text{CDCl}_3$ .....                            | 15 |
| <b>Figure S14.</b> HRESI(+)MS spectrum of compound <b>2</b> .....                                          | 16 |
| <b>Figure S15.</b> $^1\text{H}$ NMR spectrum (500 MHz) of compound <b>3</b> in $\text{CDCl}_3$ .....       | 17 |
| <b>Figure S16.</b> $^{13}\text{C}$ NMR spectrum (125 MHz) of compound <b>3</b> in $\text{CDCl}_3$ .....    | 18 |
| <b>Figure S17.</b> $^1\text{H}$ - $^1\text{H}$ COSY spectrum of compound <b>3</b> in $\text{CDCl}_3$ ..... | 19 |
| <b>Figure S18.</b> HSQC spectrum of compound <b>3</b> in $\text{CDCl}_3$ .....                             | 20 |
| <b>Figure S19.</b> HMBC spectrum of compound <b>3</b> in $\text{CDCl}_3$ .....                             | 21 |
| <b>Figure S20.</b> ROESY spectrum of compound <b>3</b> in $\text{CDCl}_3$ .....                            | 22 |
| <b>Figure S21.</b> HRESI(+)MS spectrum of compound <b>3</b> .....                                          | 23 |
| <b>Figure S22.</b> $^1\text{H}$ NMR spectrum (500 MHz) of compound <b>4</b> in $\text{CDCl}_3$ .....       | 24 |
| <b>Figure S23.</b> $^{13}\text{C}$ NMR spectrum (125 MHz) of compound <b>4</b> in $\text{CDCl}_3$ .....    | 25 |
| <b>Figure S24.</b> $^1\text{H}$ - $^1\text{H}$ COSY spectrum of compound <b>4</b> in $\text{CDCl}_3$ ..... | 26 |
| <b>Figure S25.</b> HSQC spectrum of compound <b>4</b> in $\text{CDCl}_3$ .....                             | 27 |
| <b>Figure S26.</b> HMBC spectrum of compound <b>4</b> in $\text{CDCl}_3$ .....                             | 28 |
| <b>Figure S27.</b> ROESY spectrum of compound <b>4</b> in $\text{CDCl}_3$ .....                            | 29 |
| <b>Figure S28.</b> HRESI(+)MS spectrum of compound <b>4</b> .....                                          | 30 |
| <b>Figure S29.</b> $^1\text{H}$ NMR spectrum (500 MHz) of compound <b>5</b> in $\text{CDCl}_3$ .....       | 31 |
| <b>Figure S30.</b> $^{13}\text{C}$ NMR spectrum (125 MHz) of compound <b>5</b> in $\text{CDCl}_3$ .....    | 32 |
| <b>Figure S31.</b> $^1\text{H}$ - $^1\text{H}$ COSY spectrum of compound <b>5</b> in $\text{CDCl}_3$ ..... | 33 |
| <b>Figure S32.</b> HSQC spectrum of compound <b>5</b> in $\text{CDCl}_3$ .....                             | 34 |
| <b>Figure S33.</b> HMBC spectrum of compound <b>5</b> in $\text{CDCl}_3$ .....                             | 35 |
| <b>Figure S34.</b> ROESY spectrum of compound <b>5</b> in $\text{CDCl}_3$ .....                            | 36 |
| <b>Figure S35.</b> HRESI(+)MS spectrum of compound <b>5</b> .....                                          | 37 |

CR-5  
CR-5 CDCl<sub>3</sub> 1HNMR

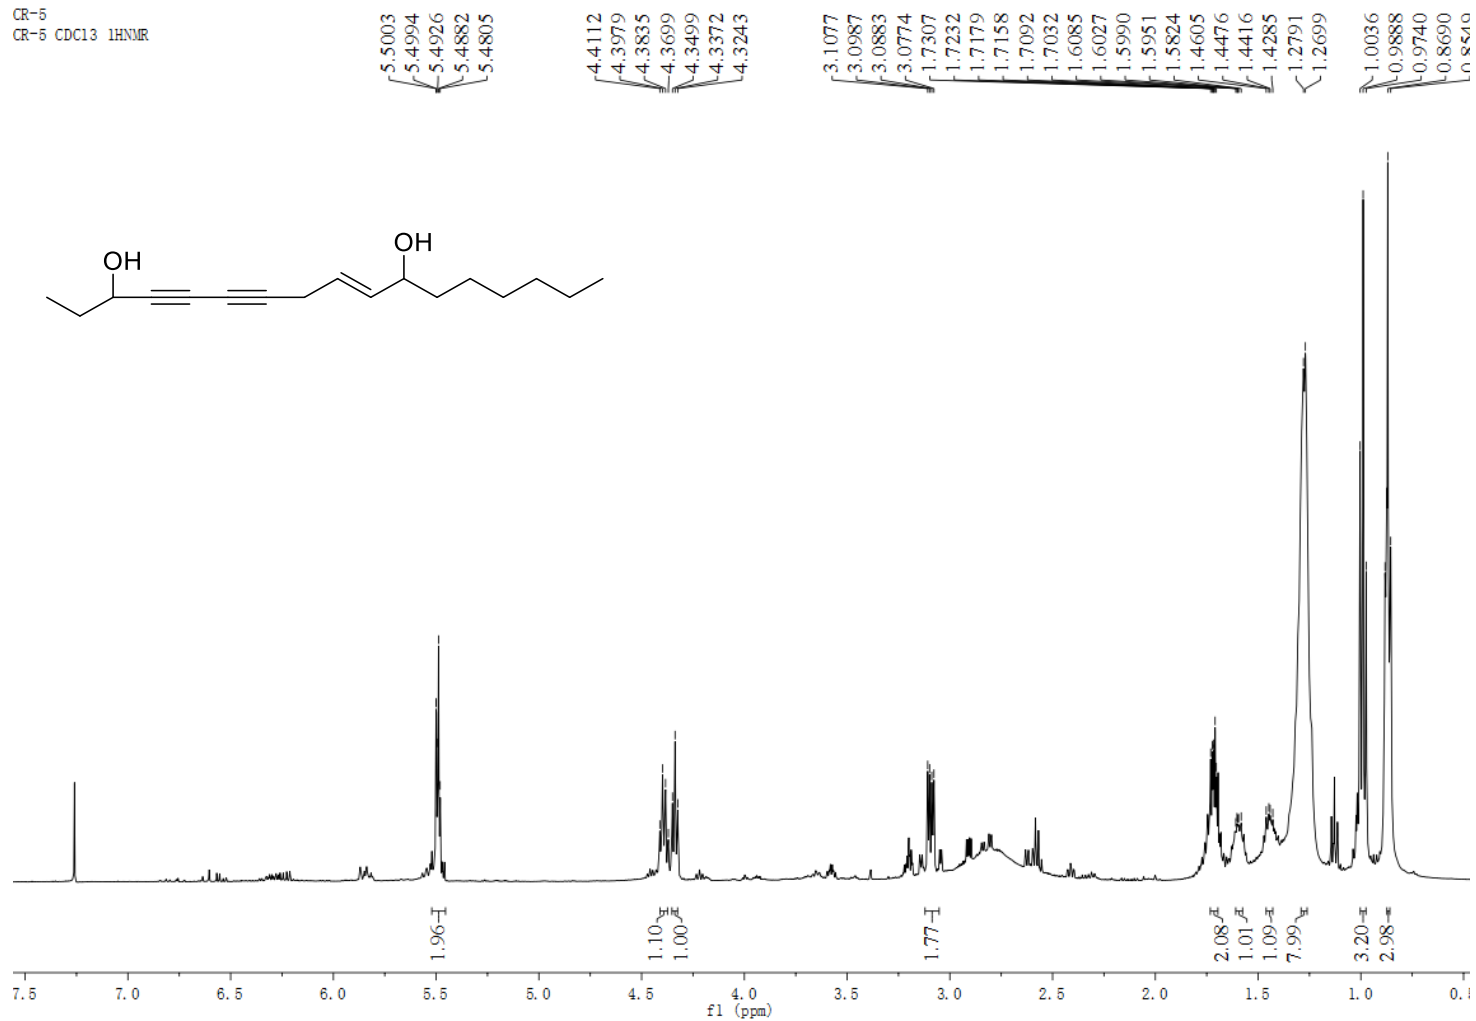

Figure S1. <sup>1</sup>H NMR spectrum (500 MHz) of compound 1 in CDCl<sub>3</sub>.

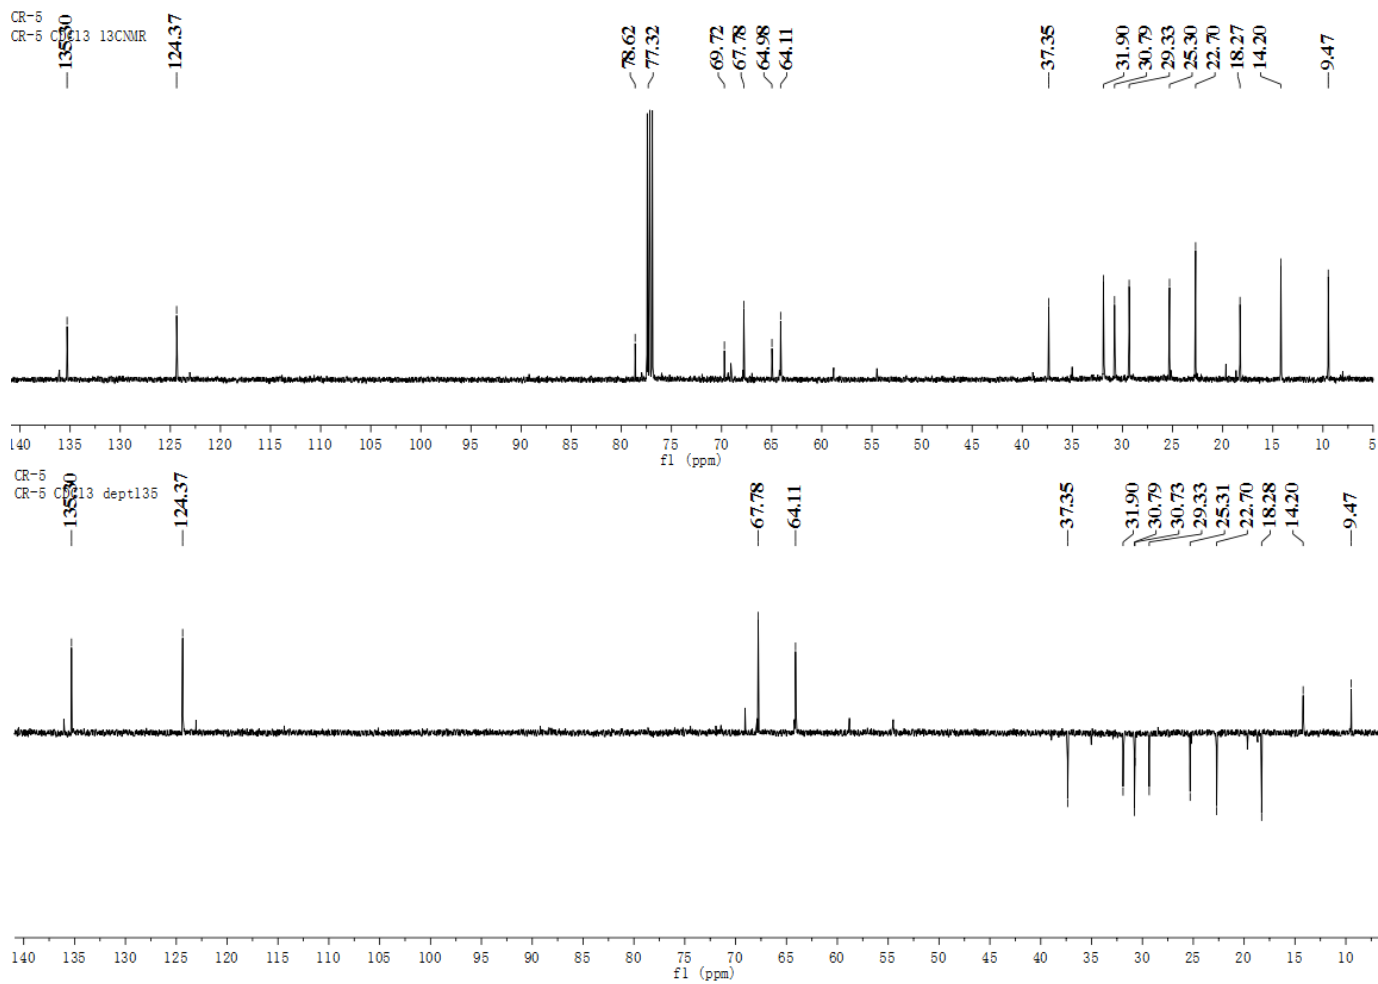

**Figure S2.**  $^{13}\text{C}$  NMR spectrum (125 MHz) of compound **1** in  $\text{CDCl}_3$ .

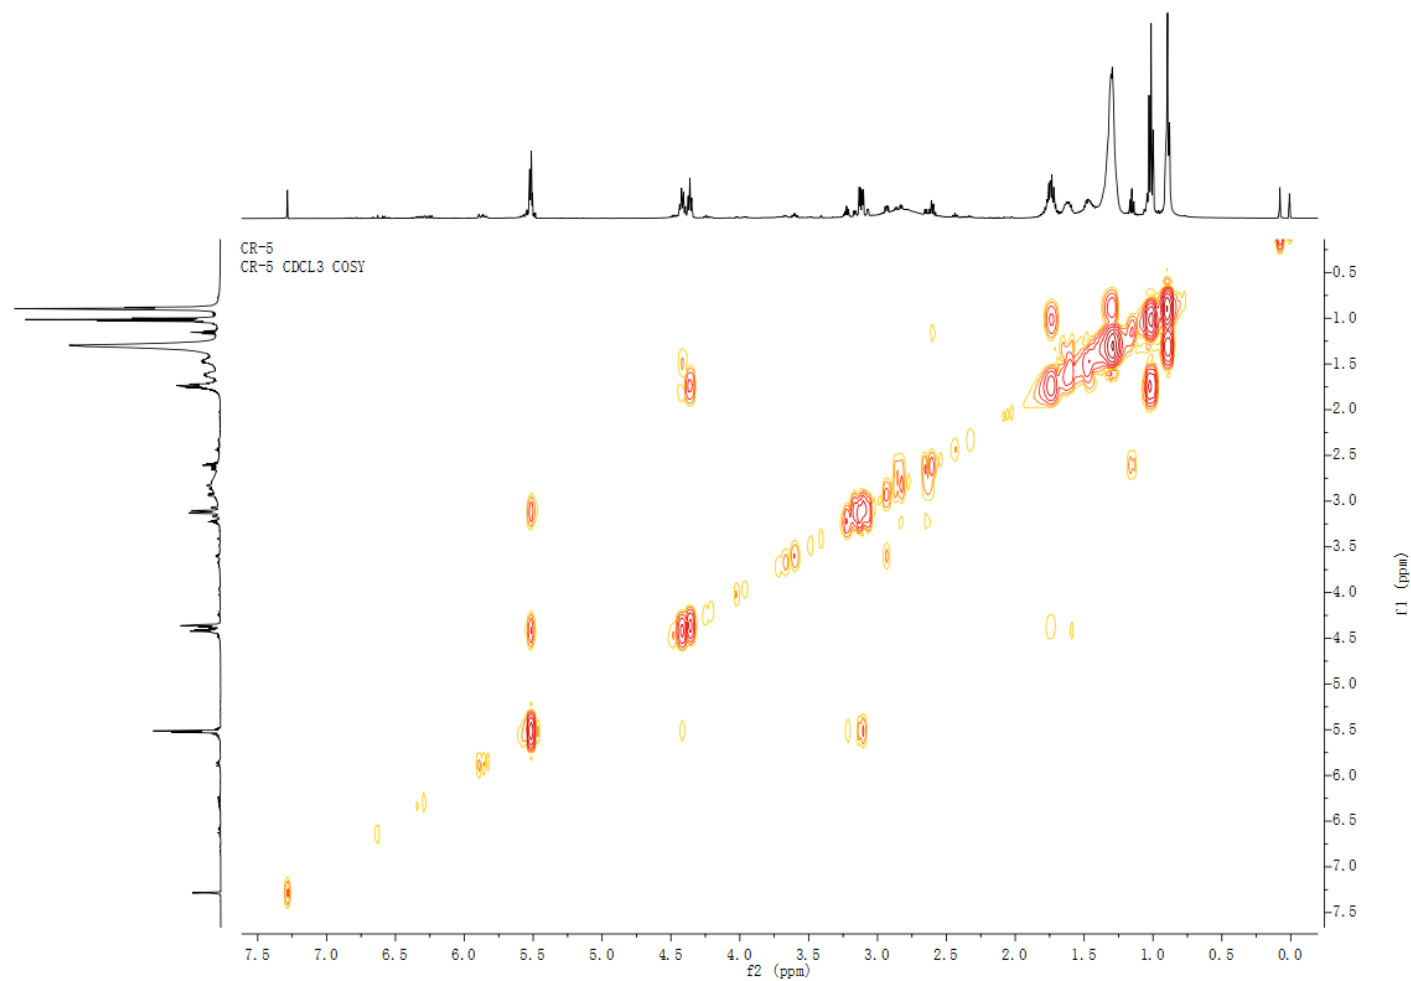

**Figure S3.**  $^1\text{H}$ - $^1\text{H}$  COSY spectrum of compound **1** in  $\text{CDCl}_3$ .

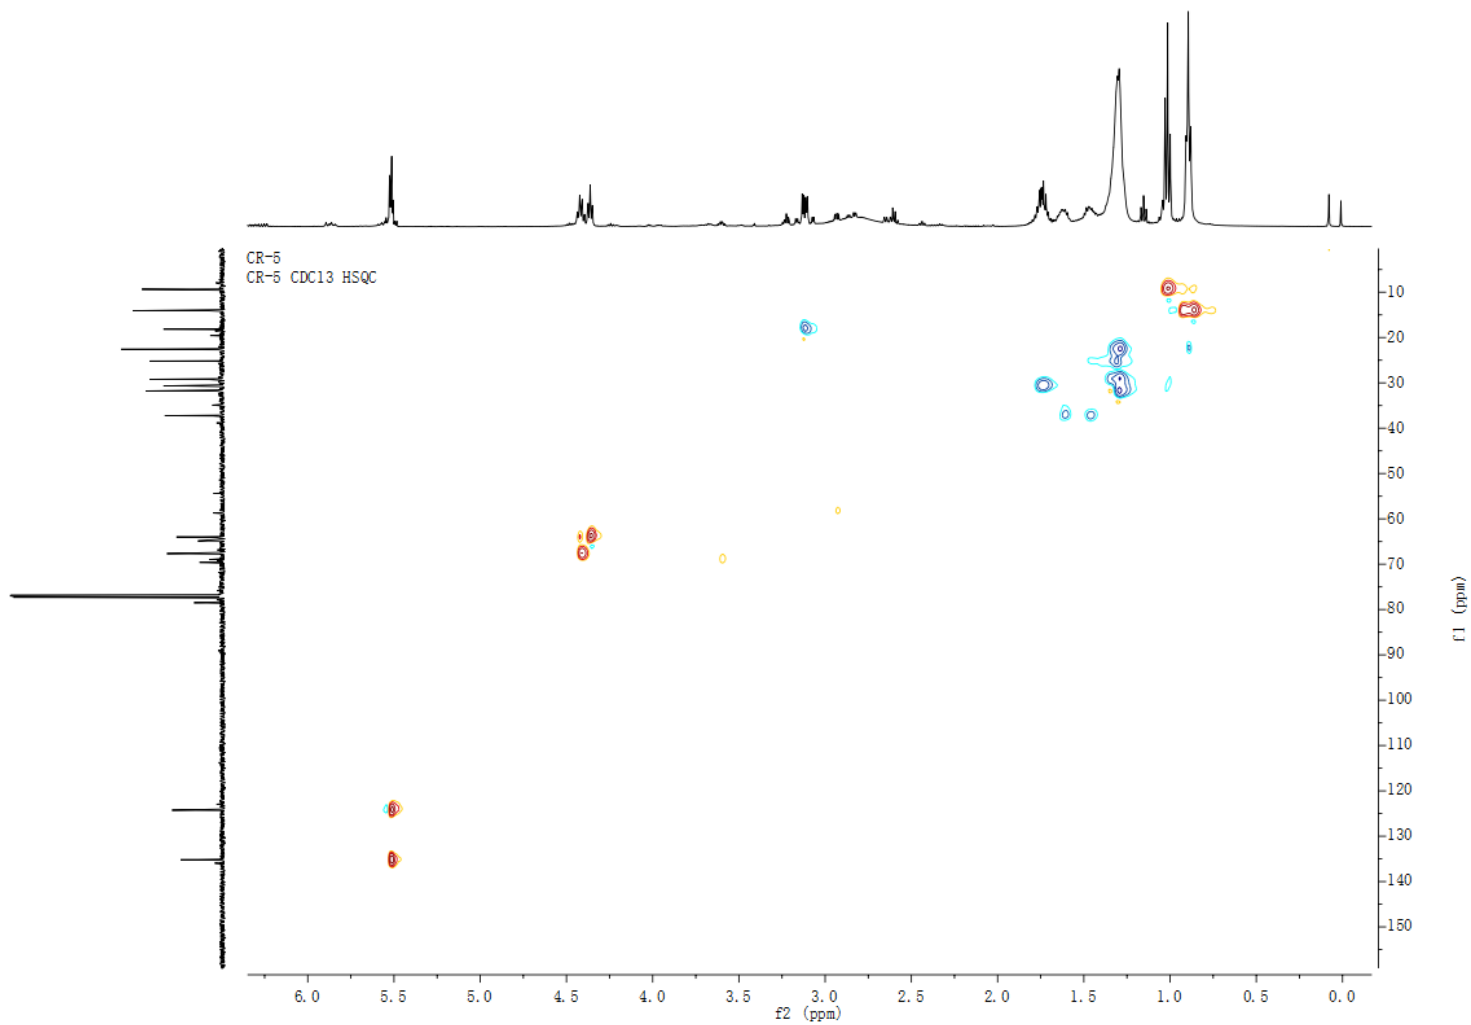

**Figure S4.** HSQC spectrum of compound **1** in CDCl<sub>3</sub>.

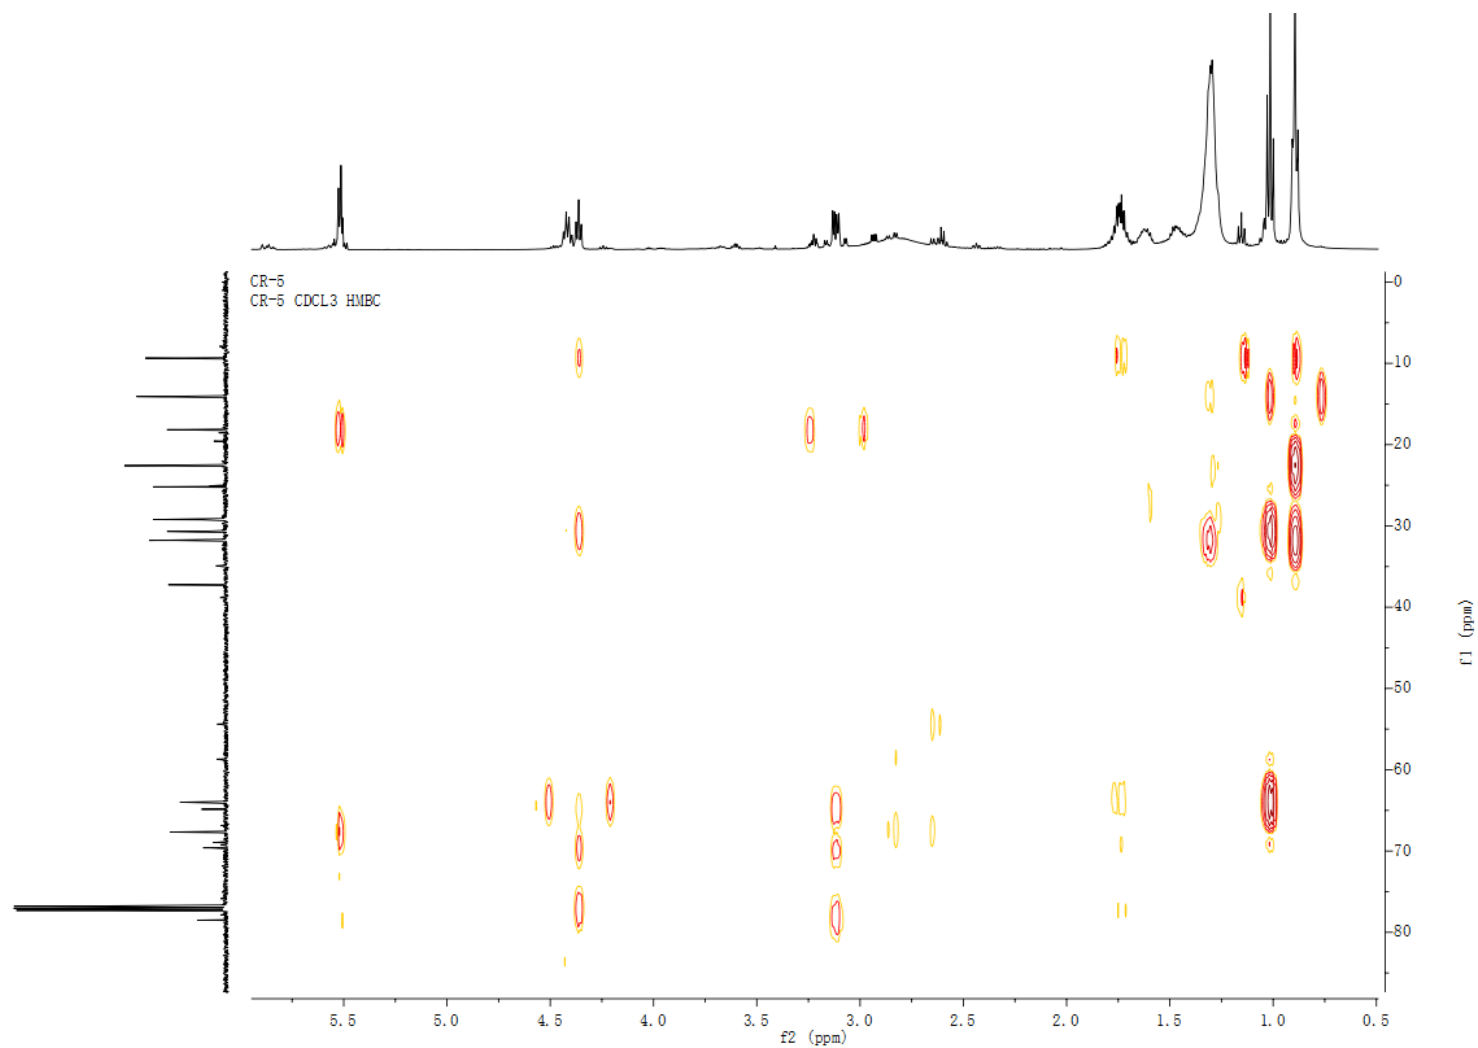

**Figure S5.** HMBC spectrum of compound **1** in CDCl<sub>3</sub>.

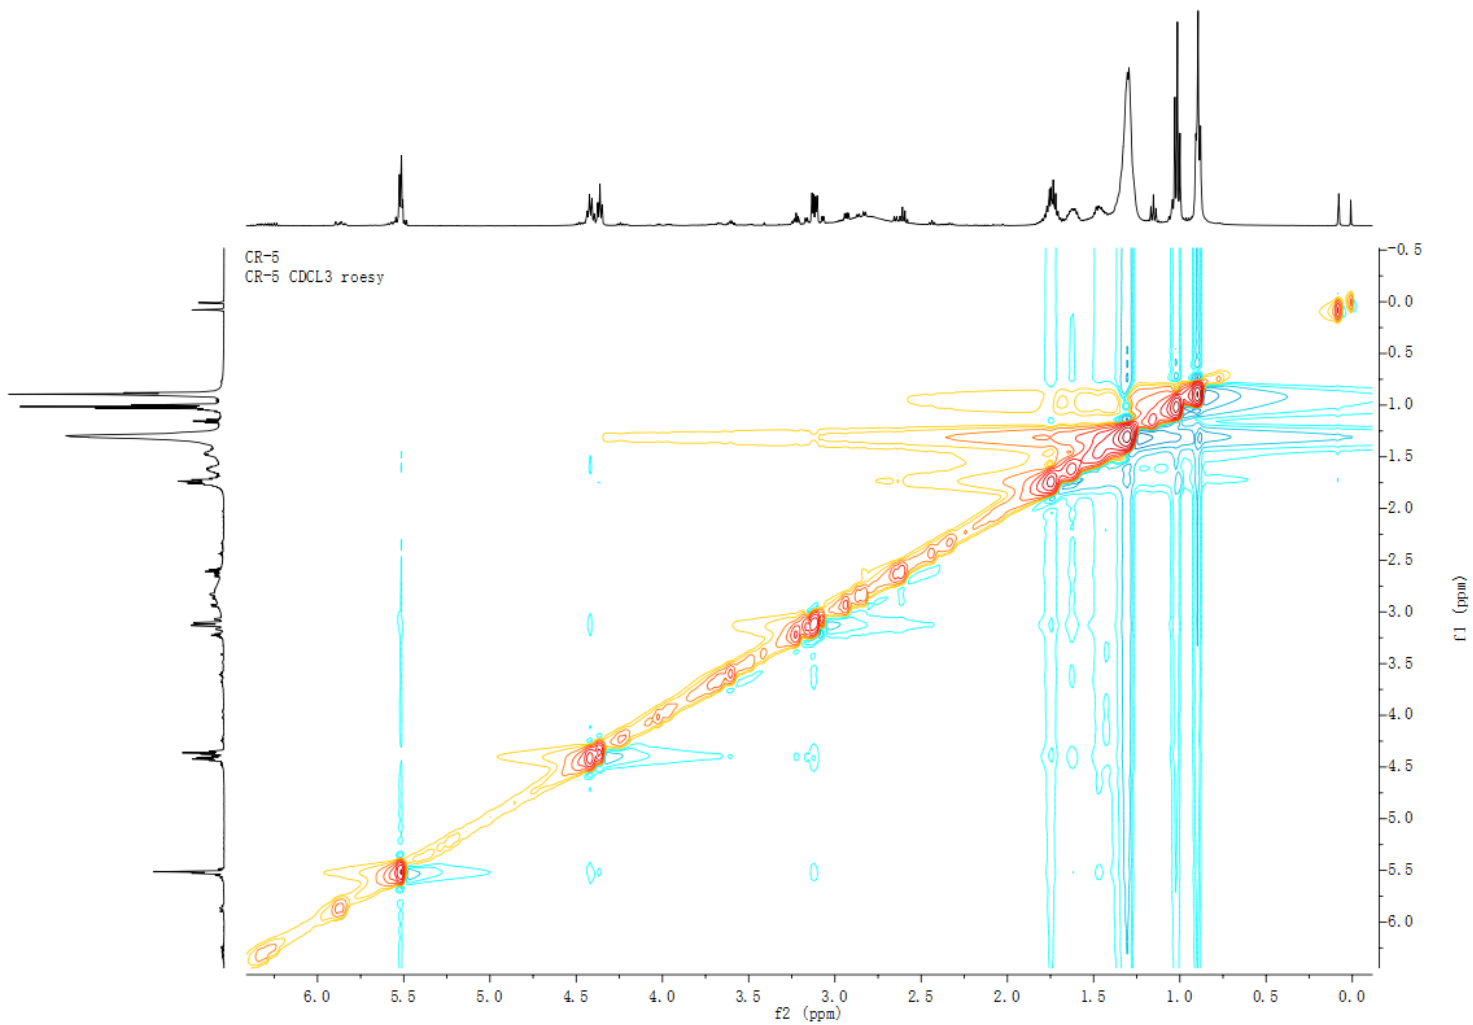

**Figure S6.** ROESY spectrum of compound **1** in CDCl<sub>3</sub>.



## Qualitative Analysis Report

|                                                                                                                                                                                                                                                                    |                                                                                                                                               |
|--------------------------------------------------------------------------------------------------------------------------------------------------------------------------------------------------------------------------------------------------------------------|-----------------------------------------------------------------------------------------------------------------------------------------------|
| <b>Data Filename</b> 150113ESI(A4).d<br><b>Sample Type</b> Sample<br><b>Instrument Name</b> Agilent G6230 TOF MS<br><b>Acq Method</b> ESI.m<br><b>IRM Calibration Status</b> <span style="background-color: green; color: white;">Success</span><br><b>Comment</b> | <b>Sample Name</b> CR-5<br><b>Position</b> KIB<br><b>User Name</b> KIB<br><b>Acquired Time</b> 1/12/2015 1:50:27 PM<br><b>DA Method</b> ESI.m |
|--------------------------------------------------------------------------------------------------------------------------------------------------------------------------------------------------------------------------------------------------------------------|-----------------------------------------------------------------------------------------------------------------------------------------------|

**Sample Group** 6200 series TOF/6500 series  
**Acquisition SW** Q-TOF B.05.01 (B5125.2)  
**Version** Info.

### User Spectra

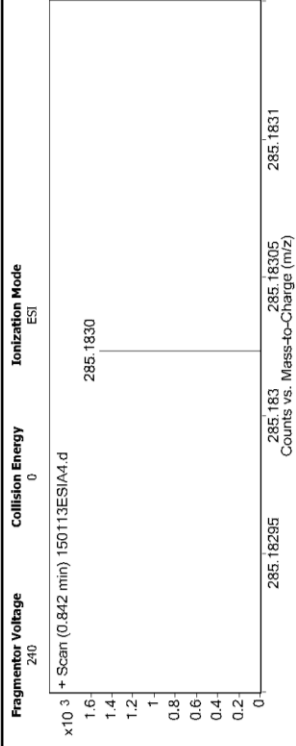

| Peak List | m/z       | z | Abund   |
|-----------|-----------|---|---------|
|           | 105.0458  |   | 4378.09 |
|           | 121.0509  | 1 | 8292.57 |
|           | 193.0494  | 1 | 2694.31 |
|           | 274.2738  | 1 | 3758.84 |
|           | 318.3002  | 1 | 4489.7  |
|           | 512.5038  | 1 | 2579.33 |
|           | 540.5347  | 1 | 3205.15 |
|           | 922.0098  | 1 | 3292.58 |
|           | 923.0125  | 1 | 5390.13 |
|           | 1821.9496 | 1 | 3029.58 |

| Formula Calculator Element Limits |           |
|-----------------------------------|-----------|
| Element                           | Min   Max |
| C                                 | 0   200   |
| H                                 | 0   400   |
| O                                 | 0   8     |
| Na                                | 1   1     |

| Formula Calculator Results |                |             |     |
|----------------------------|----------------|-------------|-----|
| Formula                    | CalculatedMass | Mz          | DBE |
| C17 H26 Na O2              | 285.1831       | 285.1830    | 4.5 |
|                            |                | Diff. (mba) | 0.2 |
|                            |                | Diff. (ppm) | 0.0 |

--- End Of Report ---

Figure S7. HRESI(+)-MS spectrum of compound 1.

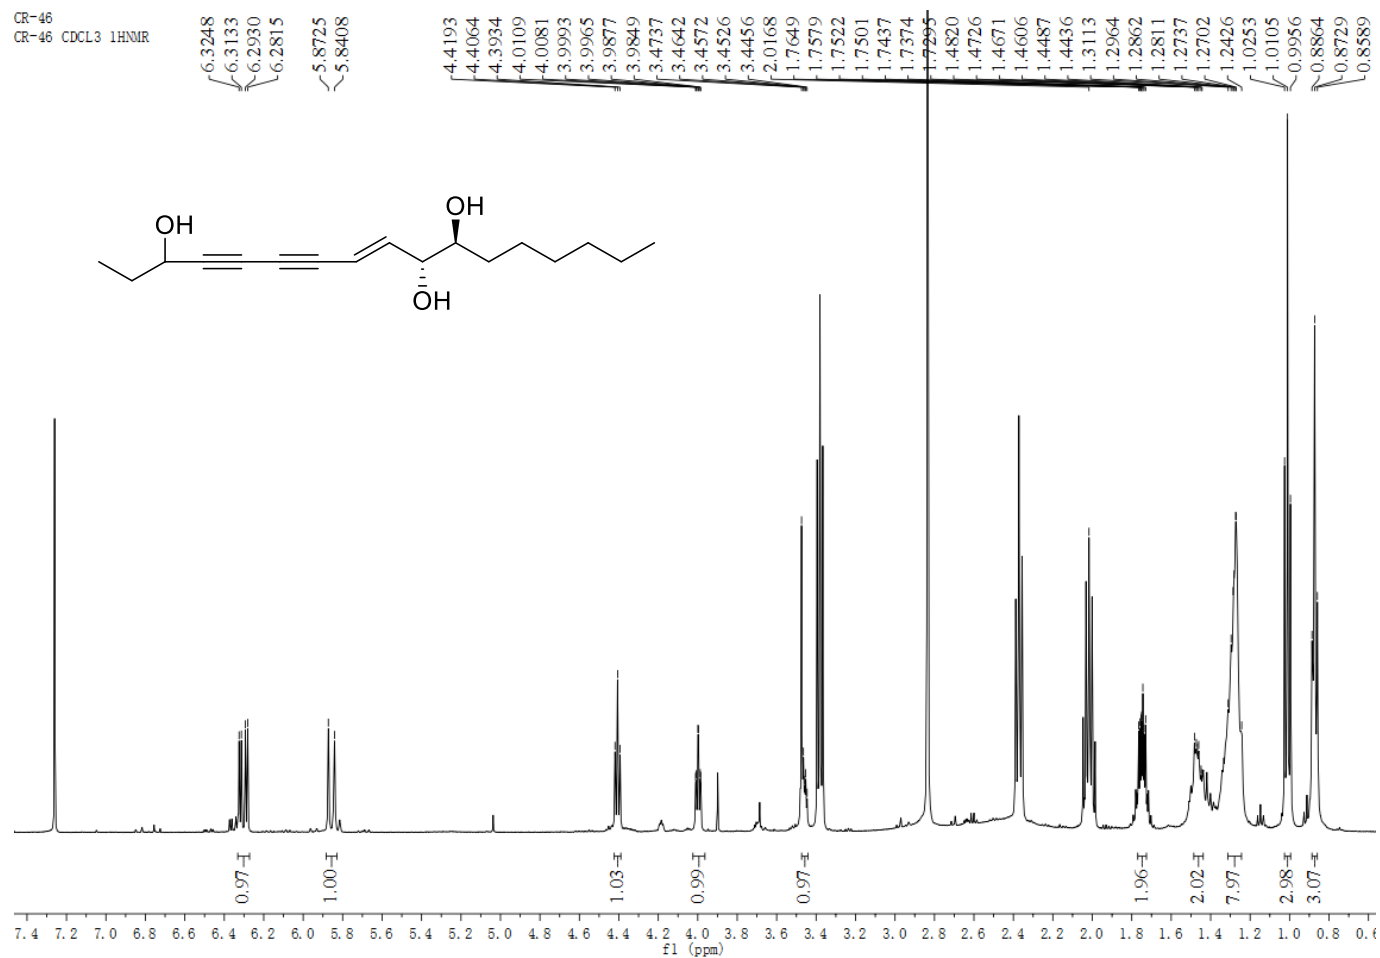

**Figure S8.** <sup>1</sup>H NMR spectrum (500 MHz) of compound **2** in CDCl<sub>3</sub>.

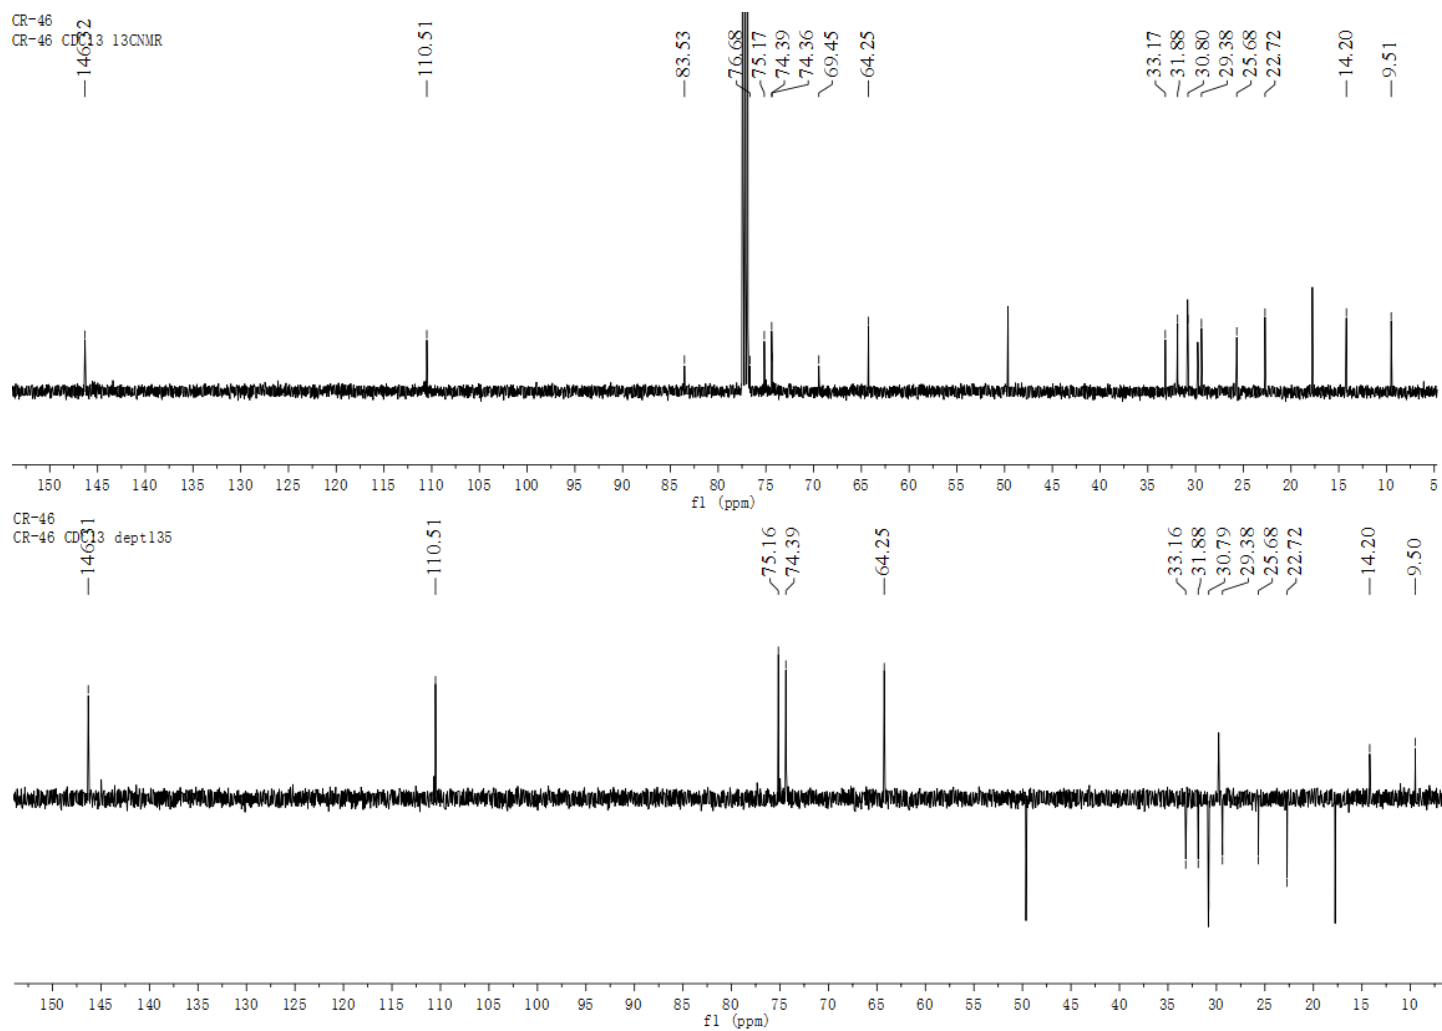

Figure S9. <sup>13</sup>C NMR spectrum (125 MHz) of compound **2** in CDCl<sub>3</sub>.

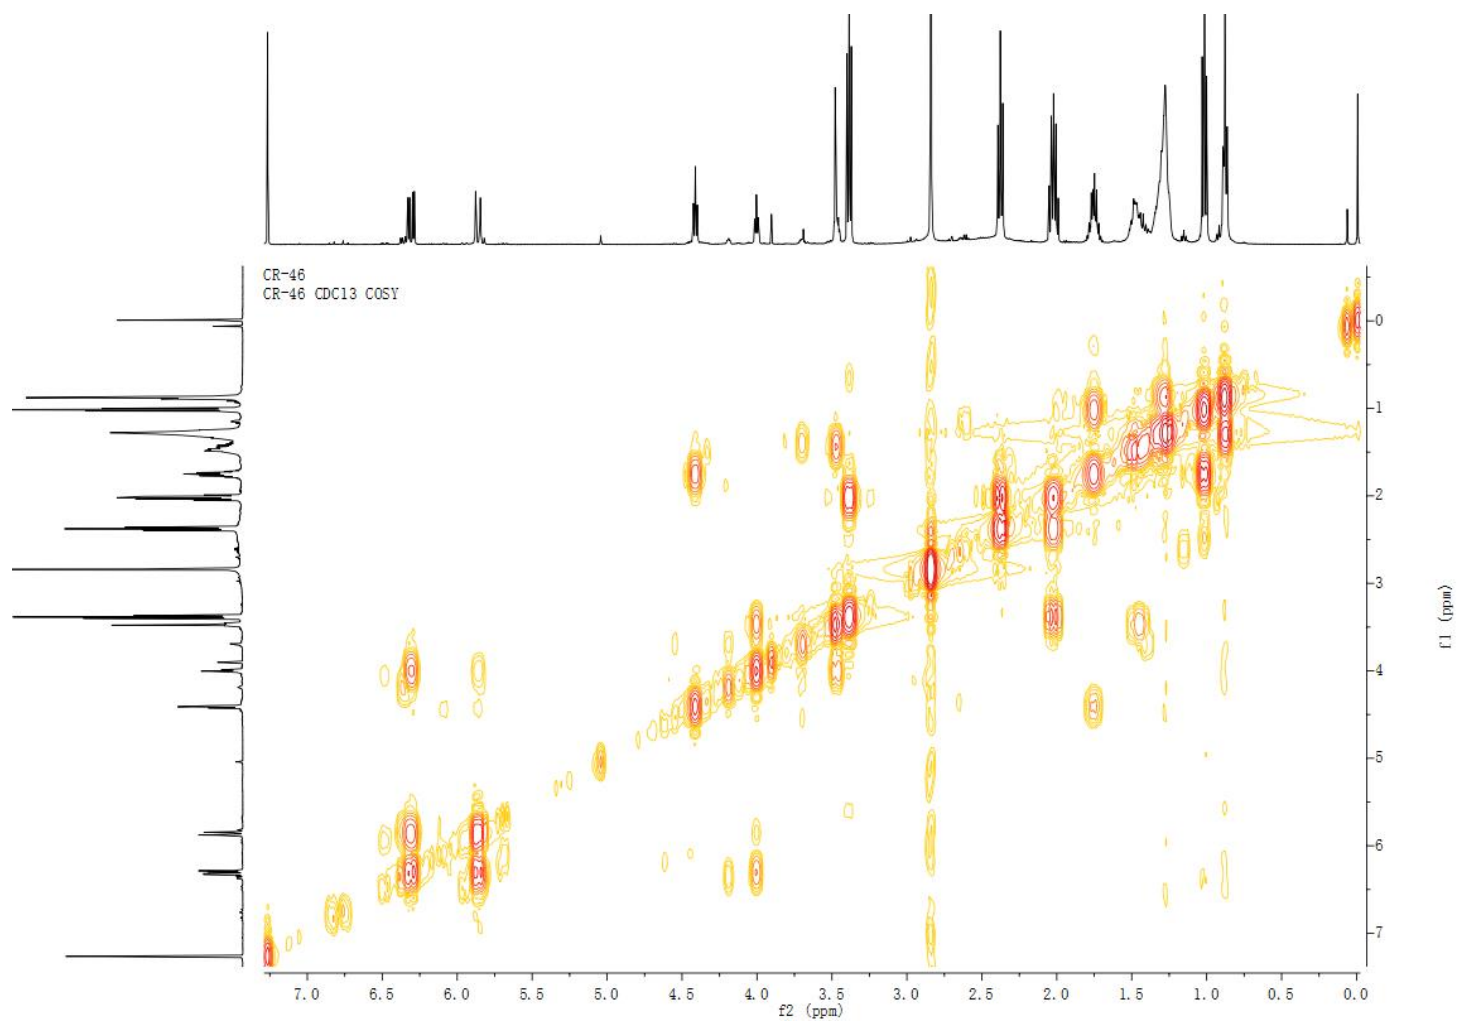

**Figure S10.**  $^1\text{H}$ - $^1\text{H}$  COSY spectrum of compound **2** in  $\text{CDCl}_3$ .

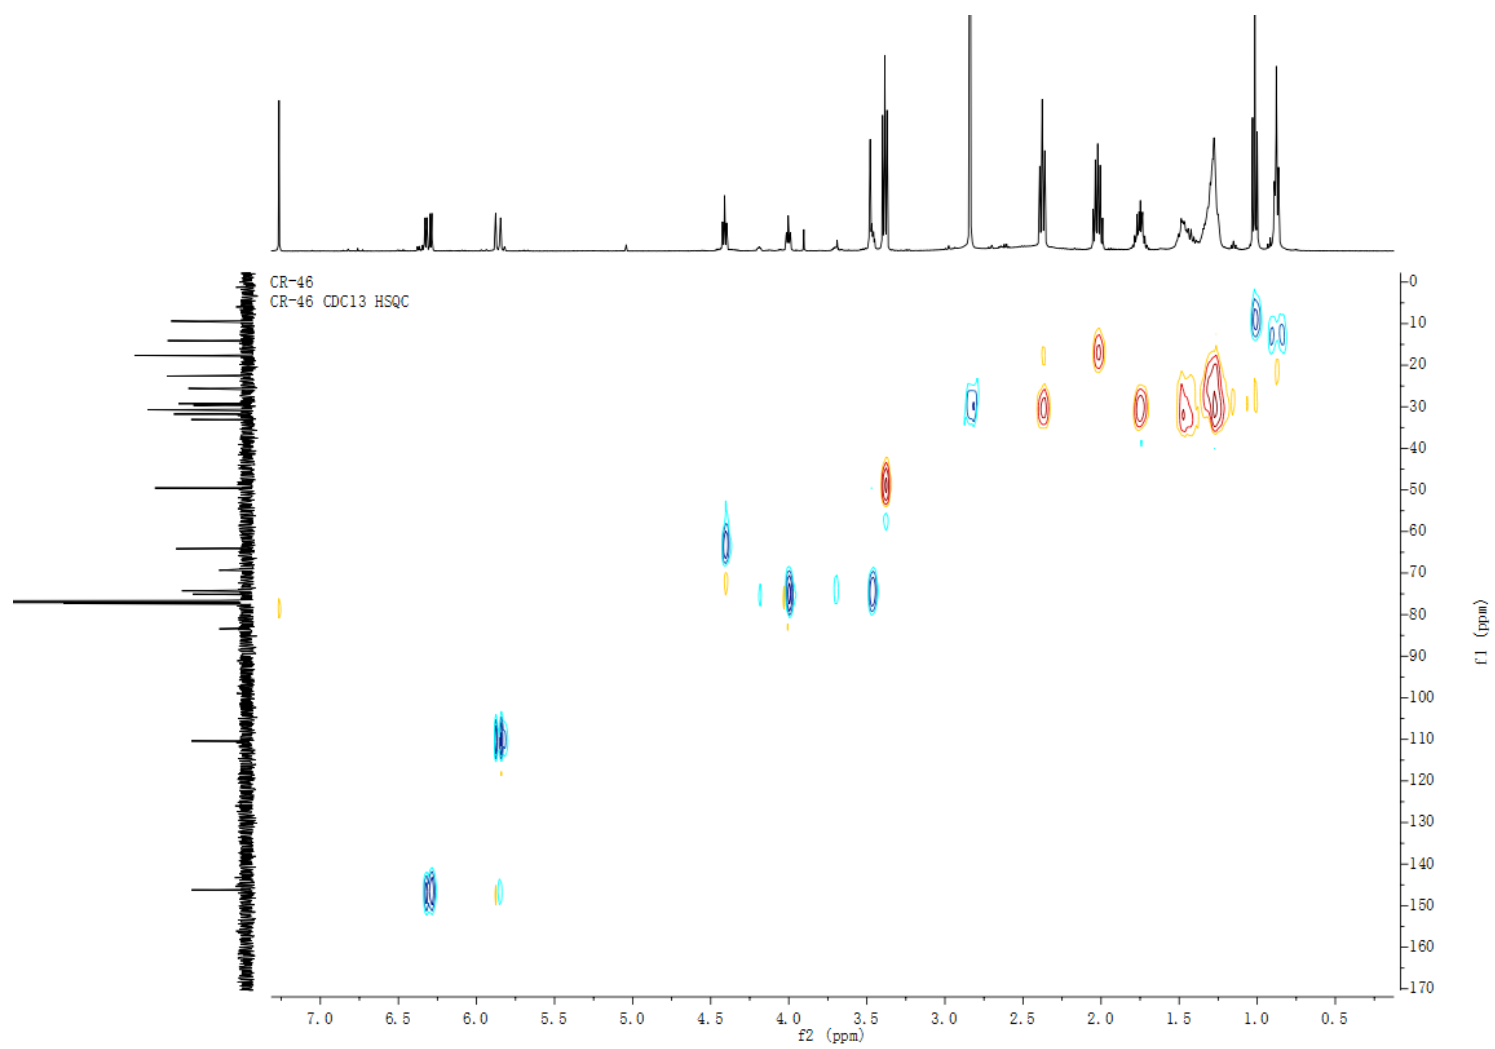

**Figure S11.** HSQC spectrum of compound **2** in CDCl<sub>3</sub>.

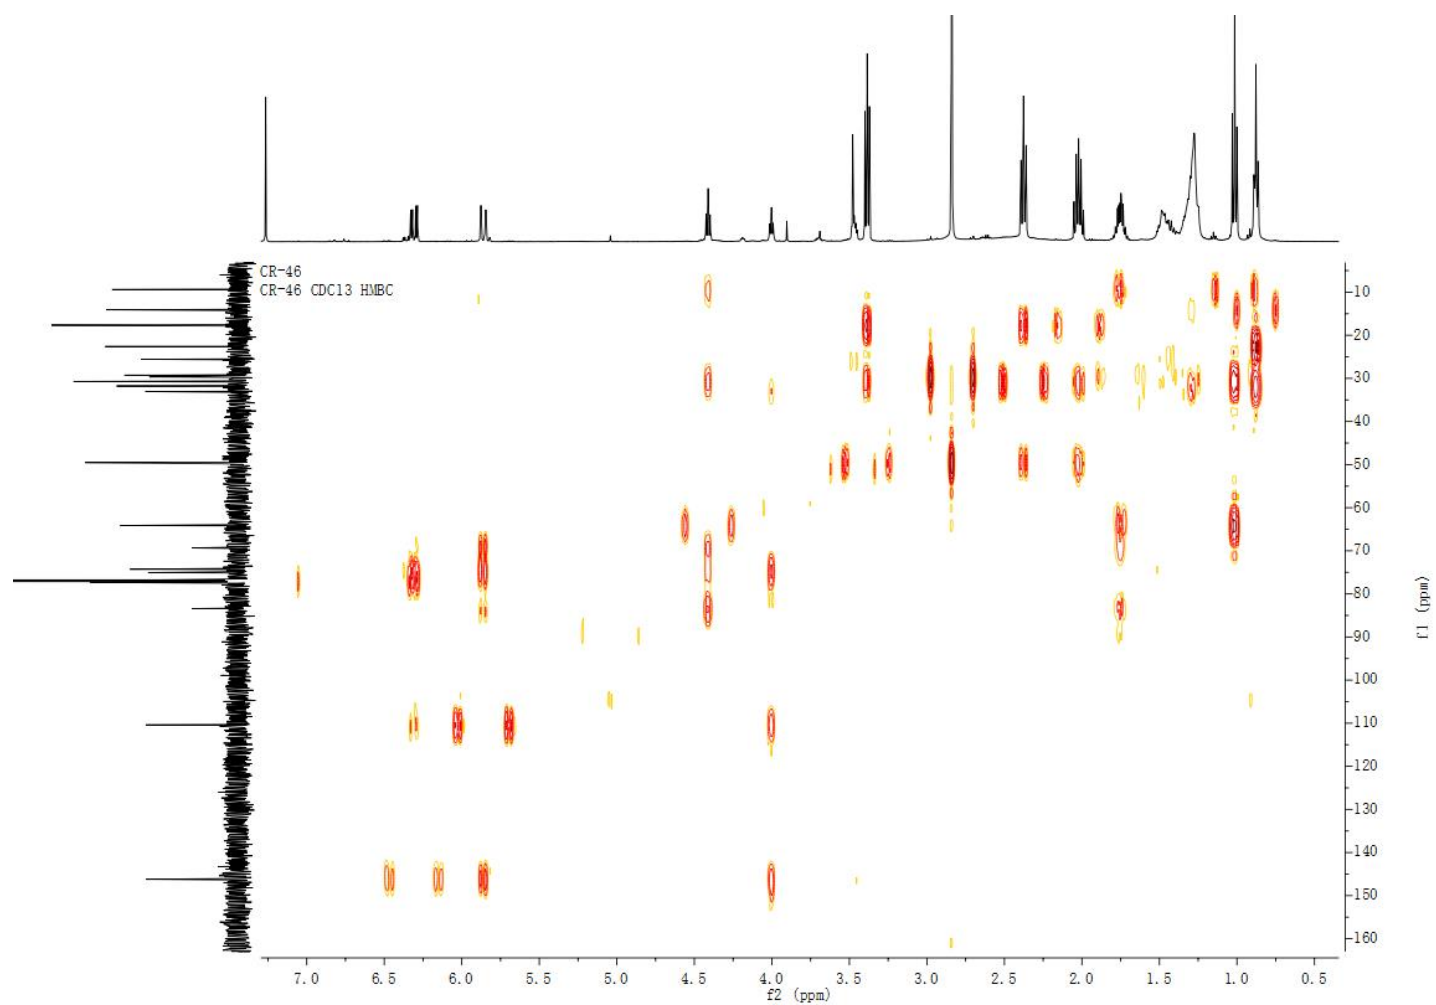

Figure S12. HMBC spectrum of compound 2 in CDCl<sub>3</sub>.

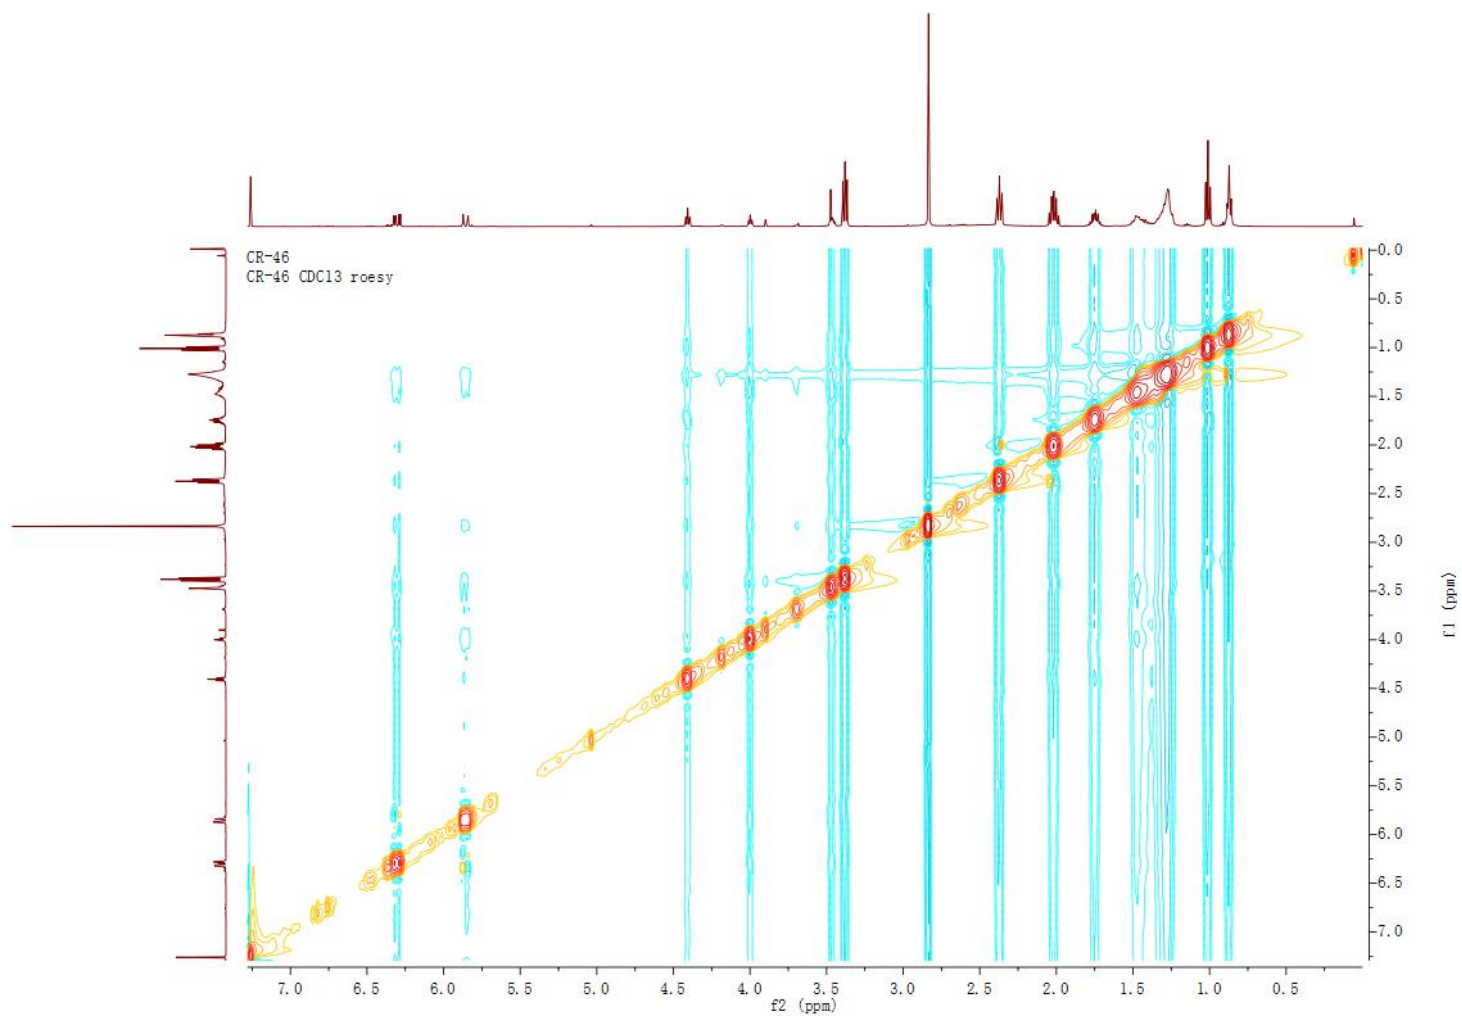

**Figure S13.** ROESY spectrum of compound **2** in CDCl<sub>3</sub>.

## Display Report

**Analysis Info**  
 Acquisition Date 5/28/2018 11:50:57 AM  
 Analysis Name D:\Data\bb\HK-DHF-93.d  
 Method DirectInfusion - MS - positive.m  
 Sample Name HK-DHF-93  
 Comment

**Acquisition Parameter**  
 Source Type ESI  
 Focus Not active  
 Scan Begin 50 m/z  
 Scan End 1300 m/z  
 Ion Polarity Positive  
 Set Capillary 4500 V  
 Set End Plate Offset -500 V  
 Set Charging Voltage 2000 V  
 Set Corona 0 nA  
 Set Nebulizer 0.4 Bar  
 Set Dry Heater 180 °C  
 Set Dry Gas 4.0 l/min  
 Set Divert Valve Waste  
 Set APCI Heater 0 °C

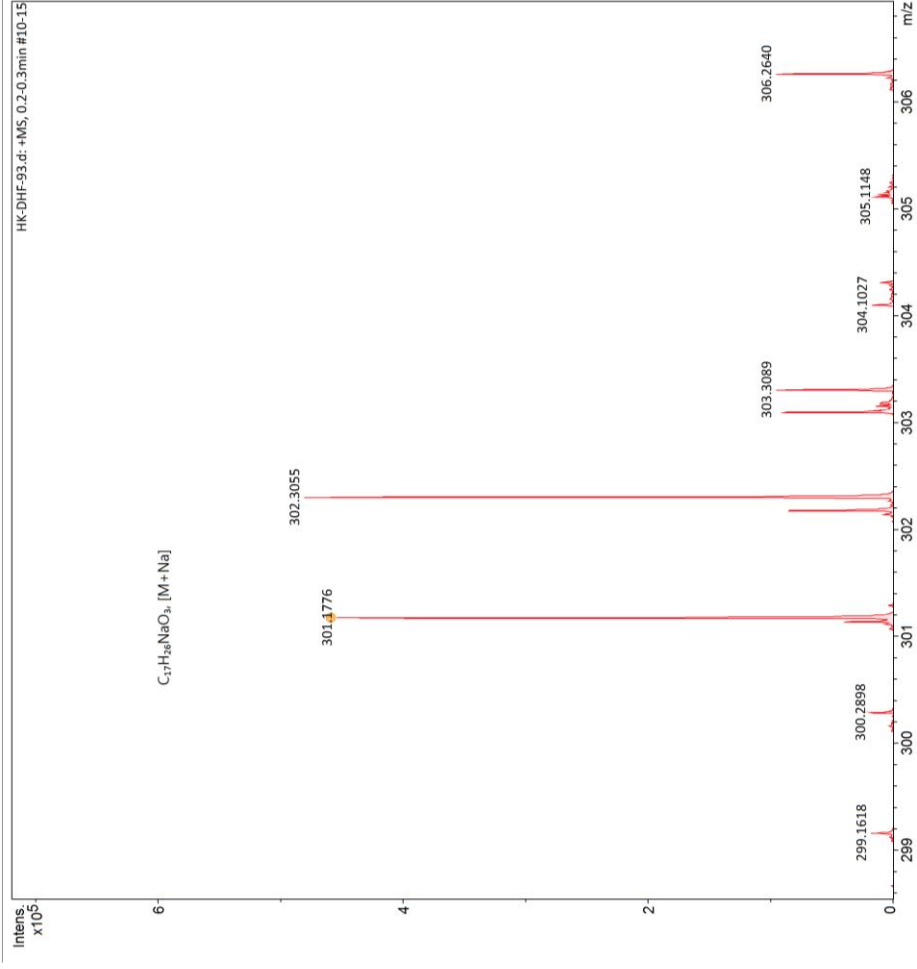

| Sum Formula                                    | Ion Formula                                      | Meas. m/z | m/z      | err [ppm] |
|------------------------------------------------|--------------------------------------------------|-----------|----------|-----------|
| C <sub>17</sub> H <sub>26</sub> O <sub>3</sub> | C <sub>17</sub> H <sub>26</sub> NaO <sub>3</sub> | 301.1780  | 301.1776 | 1.3       |

**Figure S14.** HRESI(+)-MS spectrum of compound **2**.



CR-30  
CR-30 CDCl<sub>3</sub> 1HNMR

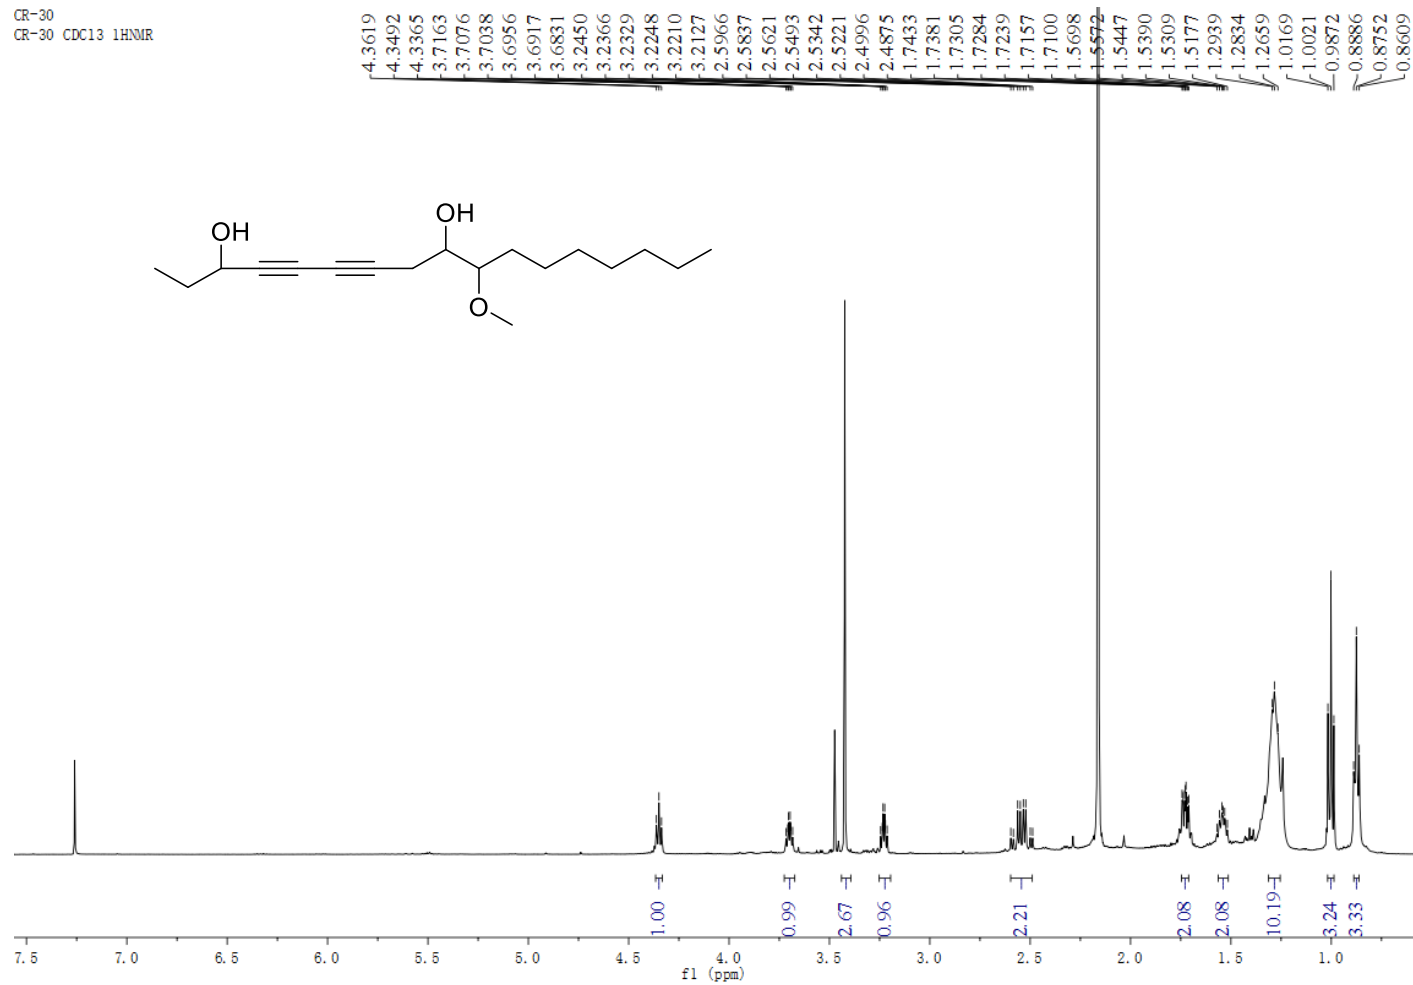

**Figure S15.** <sup>1</sup>H NMR spectrum (500 MHz) of compound **3** in CDCl<sub>3</sub>.

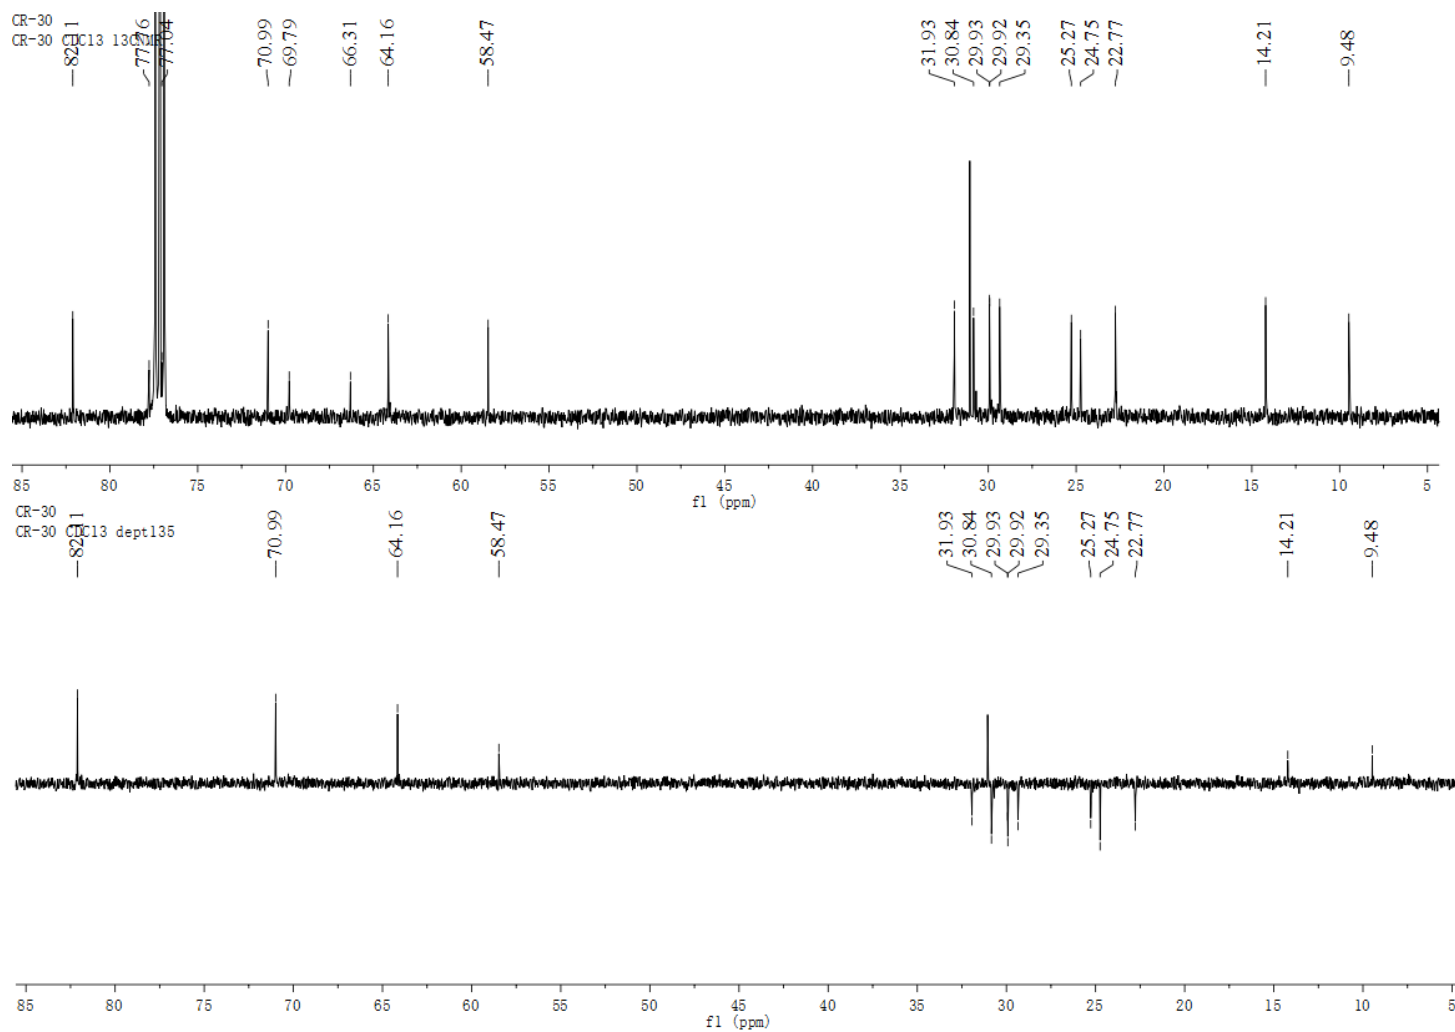

**Figure S16.**  $^{13}\text{C}$  NMR spectrum (125 MHz) of compound **3** in  $\text{CDCl}_3$ .

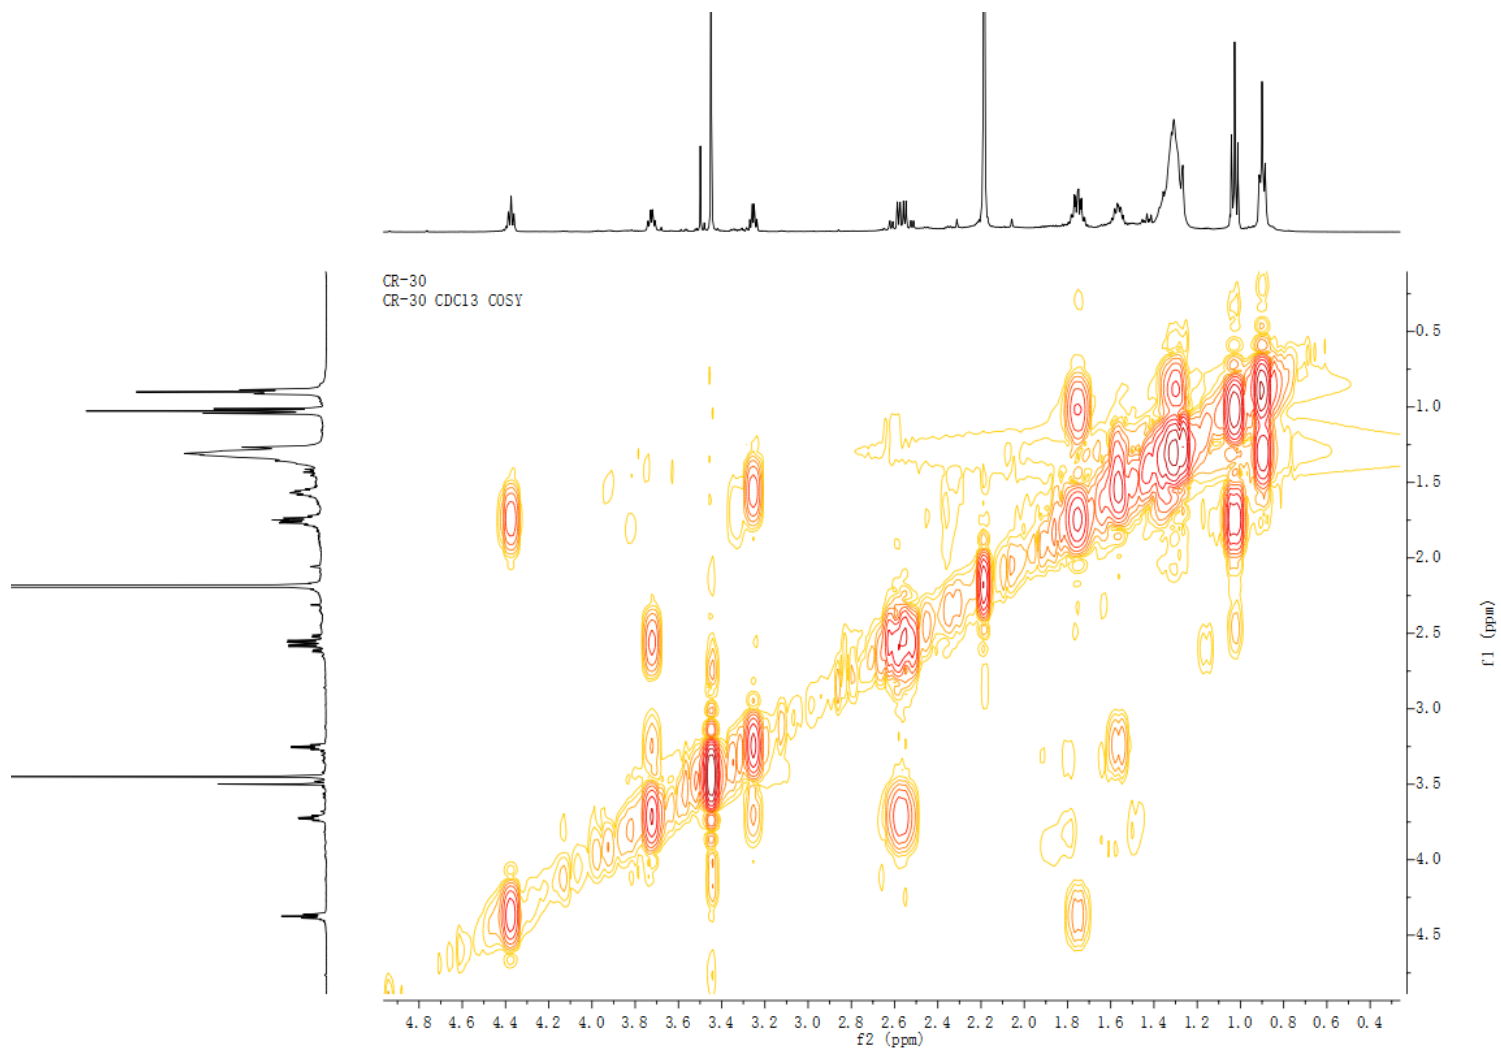

**Figure S17.**  $^1\text{H}$ - $^1\text{H}$  COSY spectrum of compound **3** in  $\text{CDCl}_3$ .

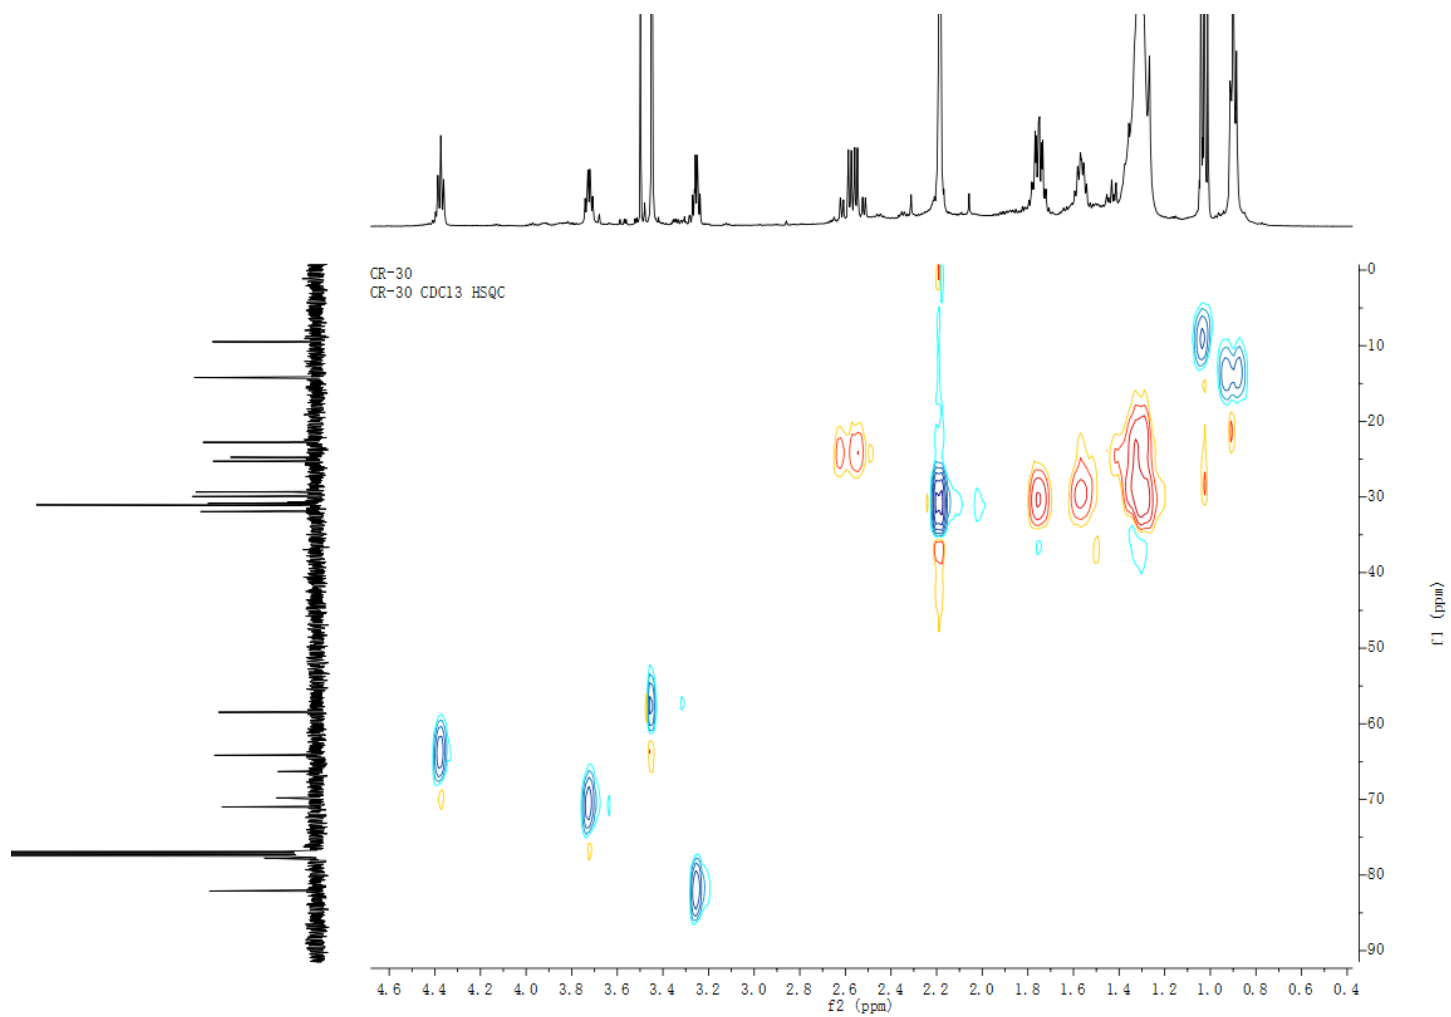

**Figure S18.** HSQC spectrum of compound **3** in CDCl<sub>3</sub>.

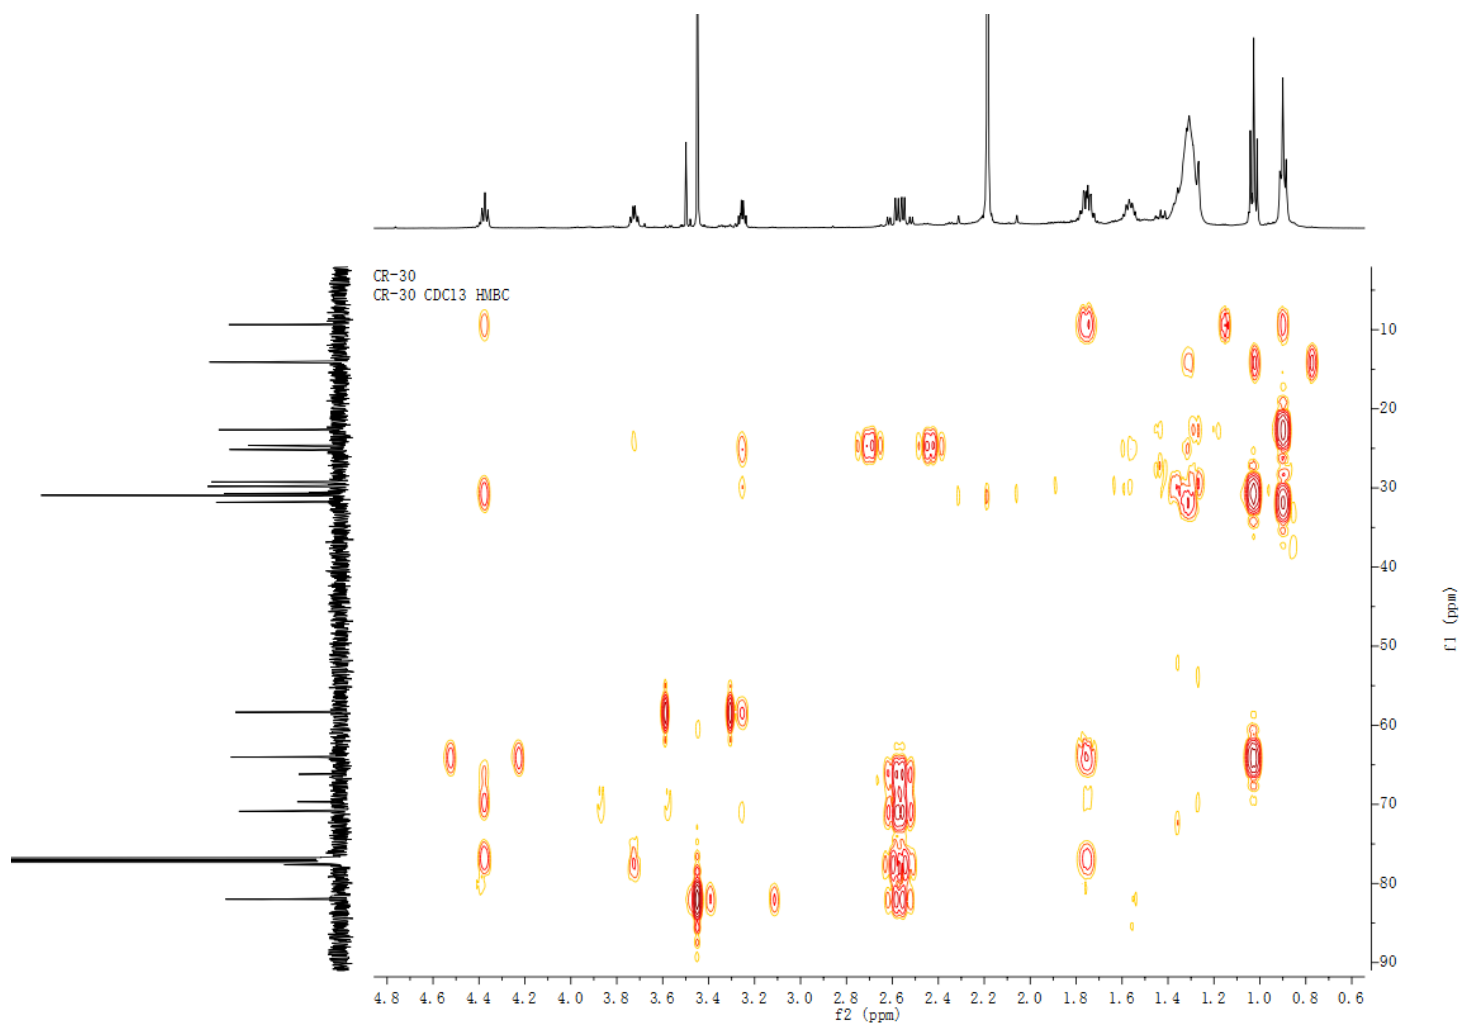

**Figure S19.** HMBC spectrum of compound **3** in CDCl<sub>3</sub>.

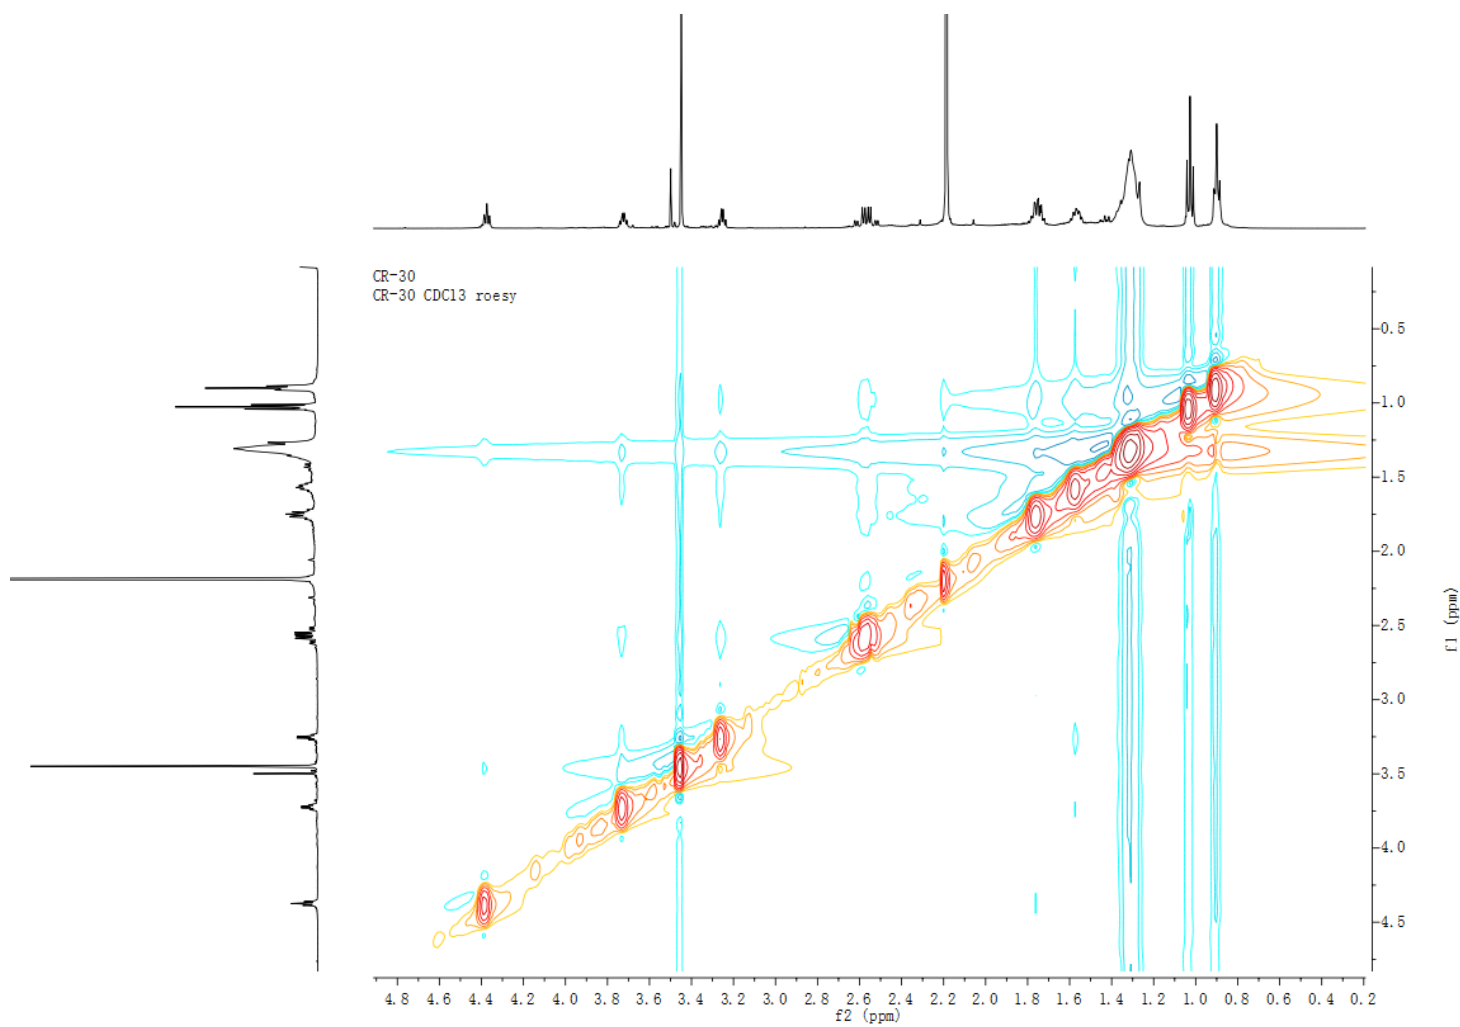

**Figure S20.** ROESY spectrum of compound **3** in CDCl<sub>3</sub>.

## Display Report

|                              |                                  |                       |
|------------------------------|----------------------------------|-----------------------|
| <b>Analysis Info</b>         | Acquisition Date                 | 5/28/2018 11:42:07 AM |
| Analysis Name                | D:\Data\lib\HK-DHF-92.d          |                       |
| Method                       | DirectInfusion - MS - positive.m |                       |
| Sample Name                  | HK-DHF-92                        |                       |
| Comment                      |                                  |                       |
| <b>Acquisition Parameter</b> | Operator                         | Demo User             |
| Source Type                  | Instrument                       | maxis II ETD          |
| ESI                          |                                  | 1823391.22332         |
| Not active                   |                                  |                       |
| Focus                        |                                  |                       |
| 50 m/z                       |                                  |                       |
| Scan Begin                   |                                  |                       |
| Scan End                     |                                  |                       |
| 1300 m/z                     |                                  |                       |
| Ion Polarity                 | Set Nebulizer                    | 0.4 Bar               |
| Positive                     | Set Dry Heater                   | 180 °C                |
| 4500 V                       | Set Dry Gas                      | 4.0 l/min             |
| -500 V                       | Set Divert Valve                 | Waste                 |
| Set End Plate Offset         | Set APCI Heater                  | 0 °C                  |
| 2000 V                       |                                  |                       |
| Set Charging Voltage         |                                  |                       |
| 0 nA                         |                                  |                       |
| Set Corona                   |                                  |                       |

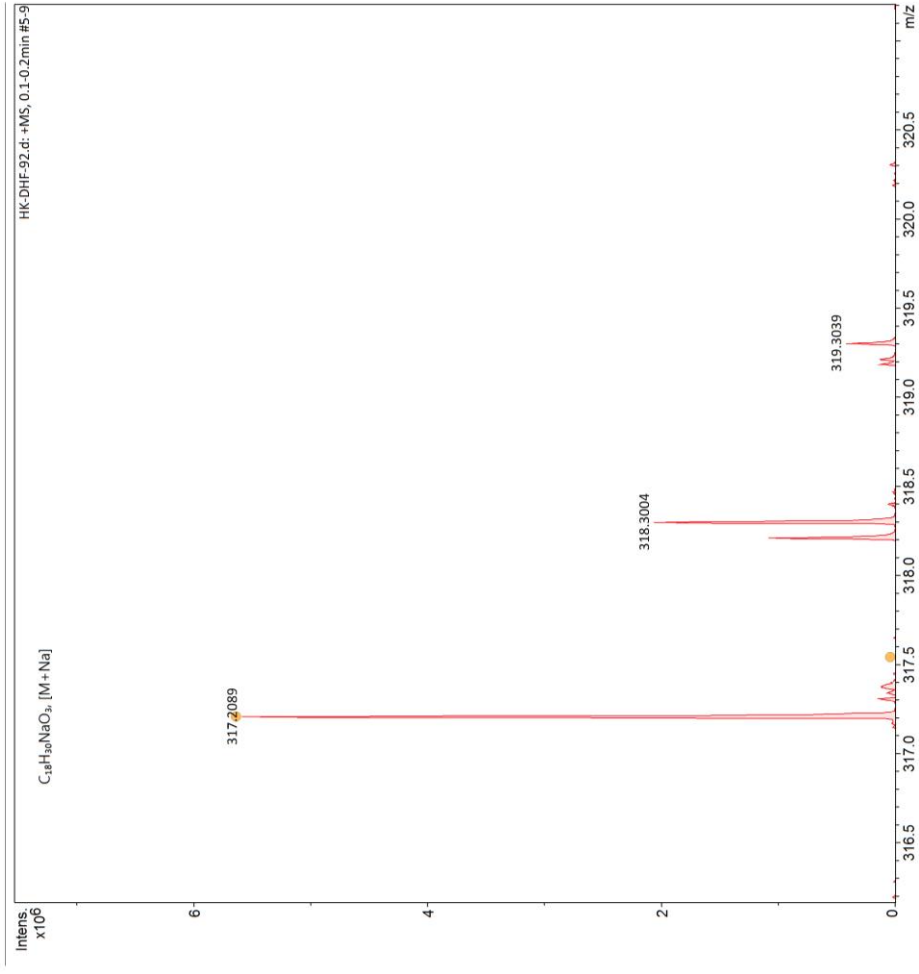

| Sum Formula                                    | Ion Formula                                      | Meas. m/z | m/z      | err | [ppm] |
|------------------------------------------------|--------------------------------------------------|-----------|----------|-----|-------|
| C <sub>18</sub> H <sub>30</sub> O <sub>3</sub> | C <sub>18</sub> H <sub>30</sub> NaO <sub>3</sub> | 317.2093  | 317.2089 | 1.3 |       |

Figure S21. HRESI(+)-MS spectrum of compound 3.

CR-17  
CR-17 CDCl<sub>3</sub> 1H NMR

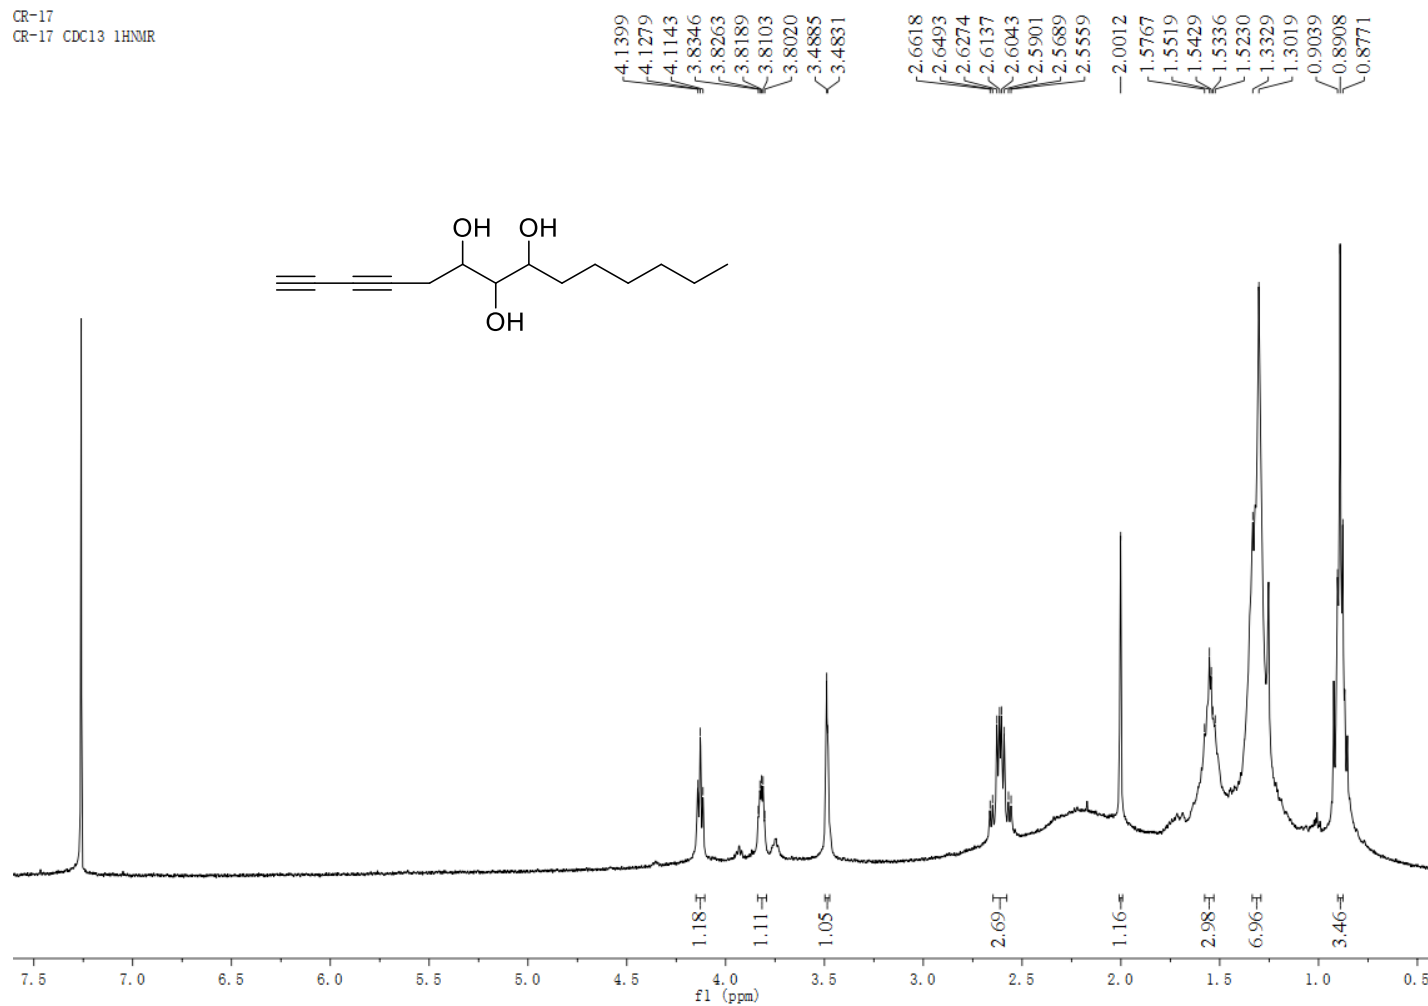

Figure S22. <sup>1</sup>H NMR spectrum (500 MHz) of compound 4 in CDCl<sub>3</sub>.



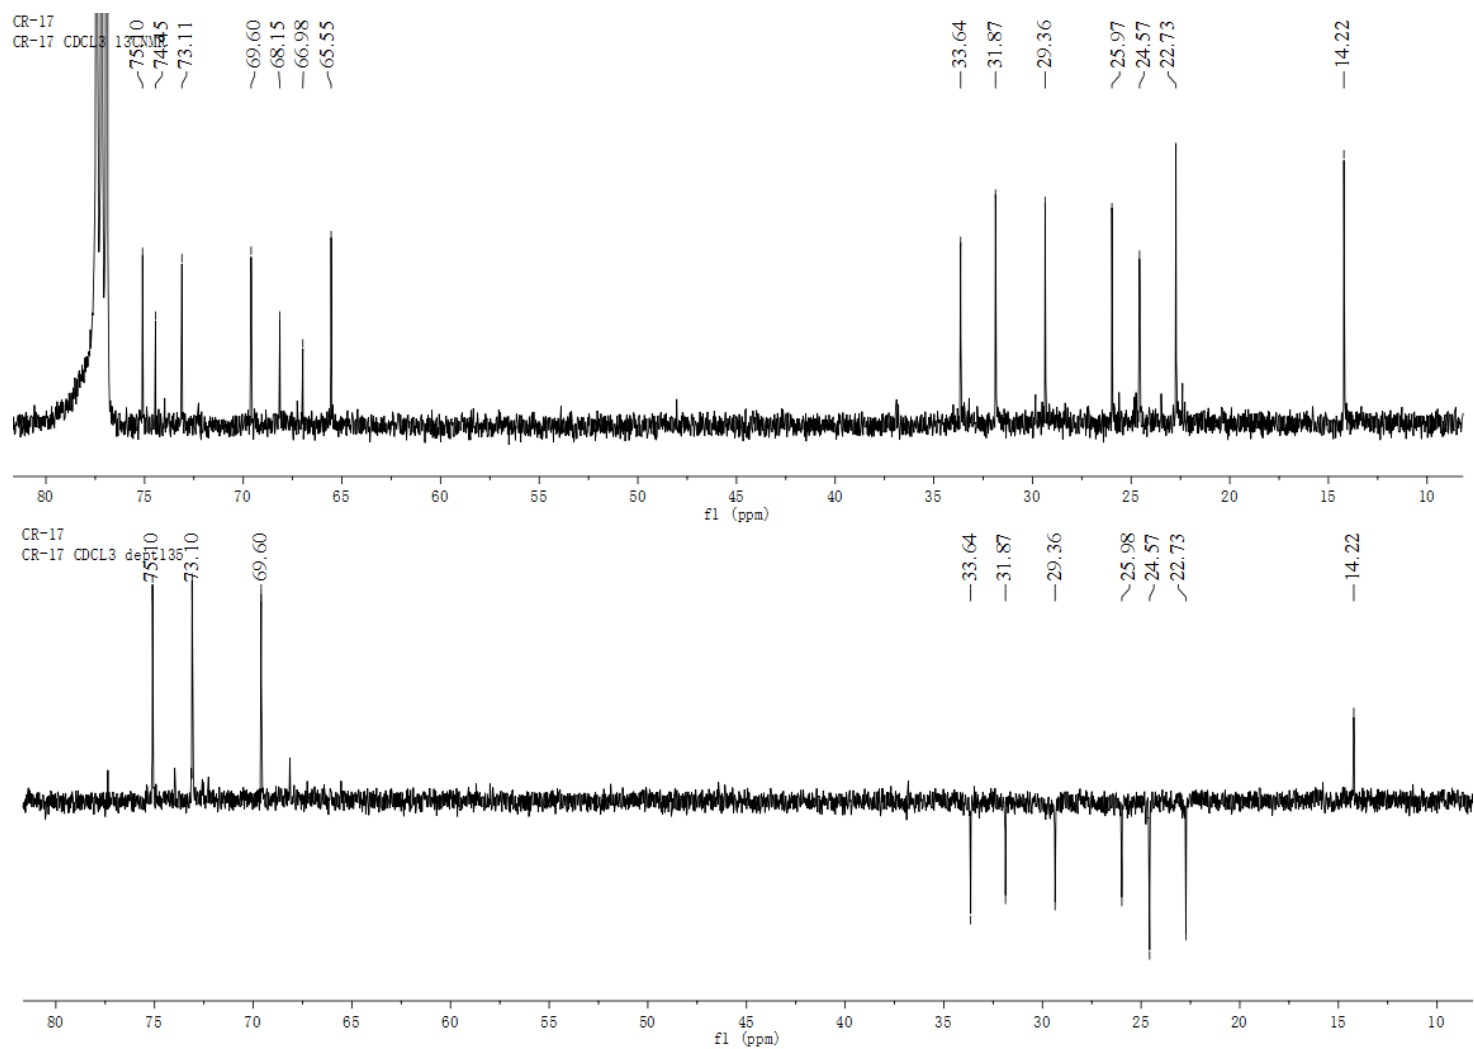

**Figure S23.** <sup>13</sup>C NMR spectrum (125 MHz) of compound **4** in CDCl<sub>3</sub>.

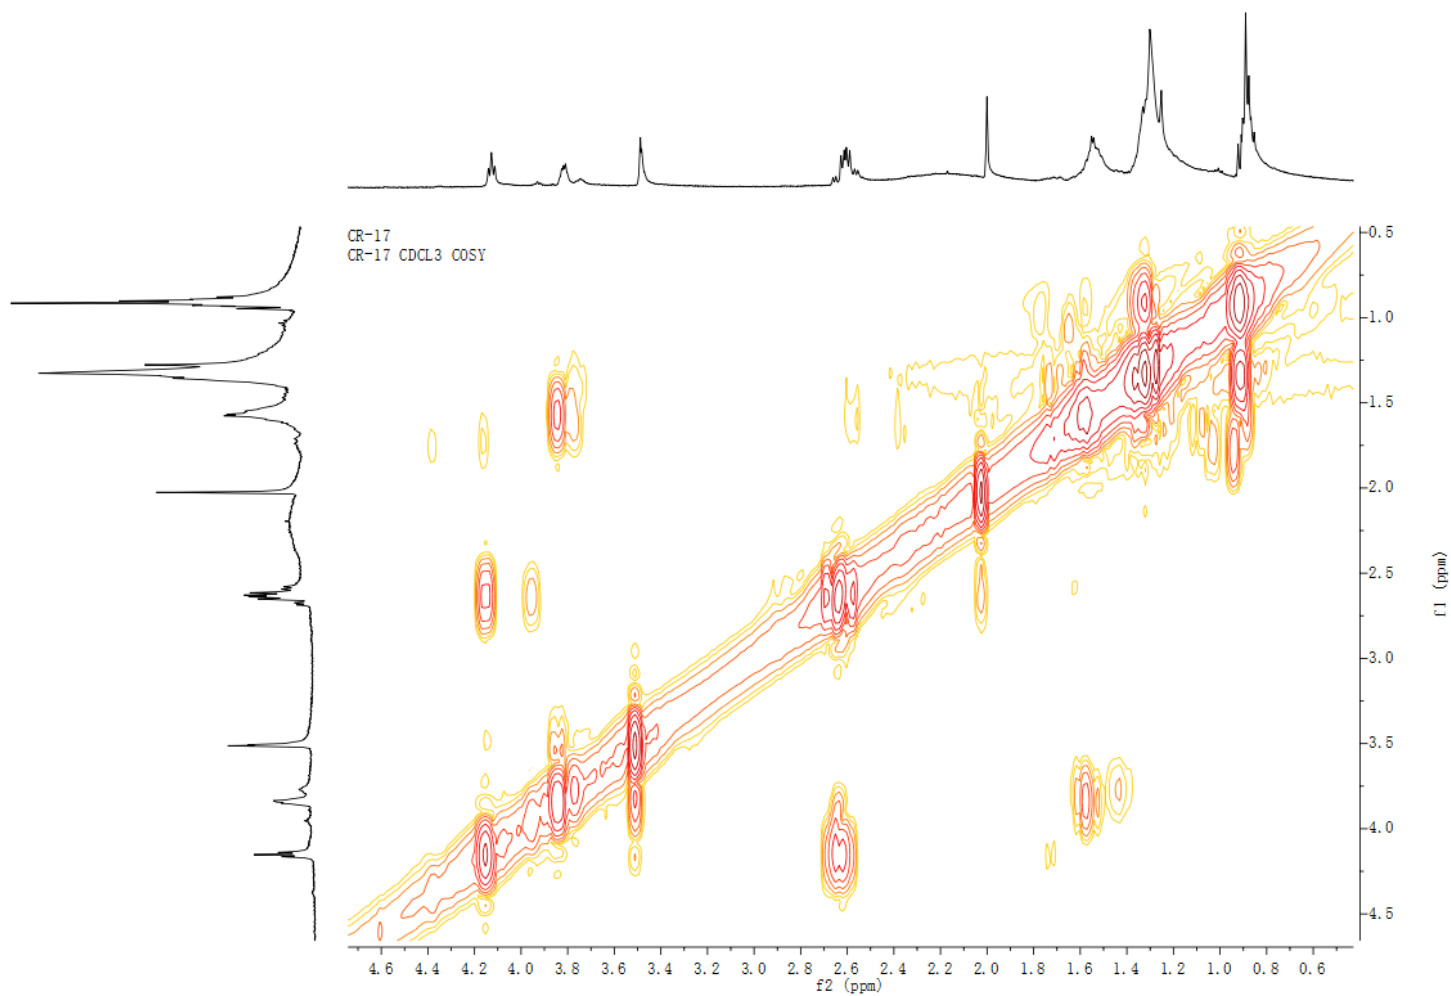

**Figure S24.**  $^1\text{H}$ - $^1\text{H}$  COSY spectrum of compound **4** in  $\text{CDCl}_3$ .

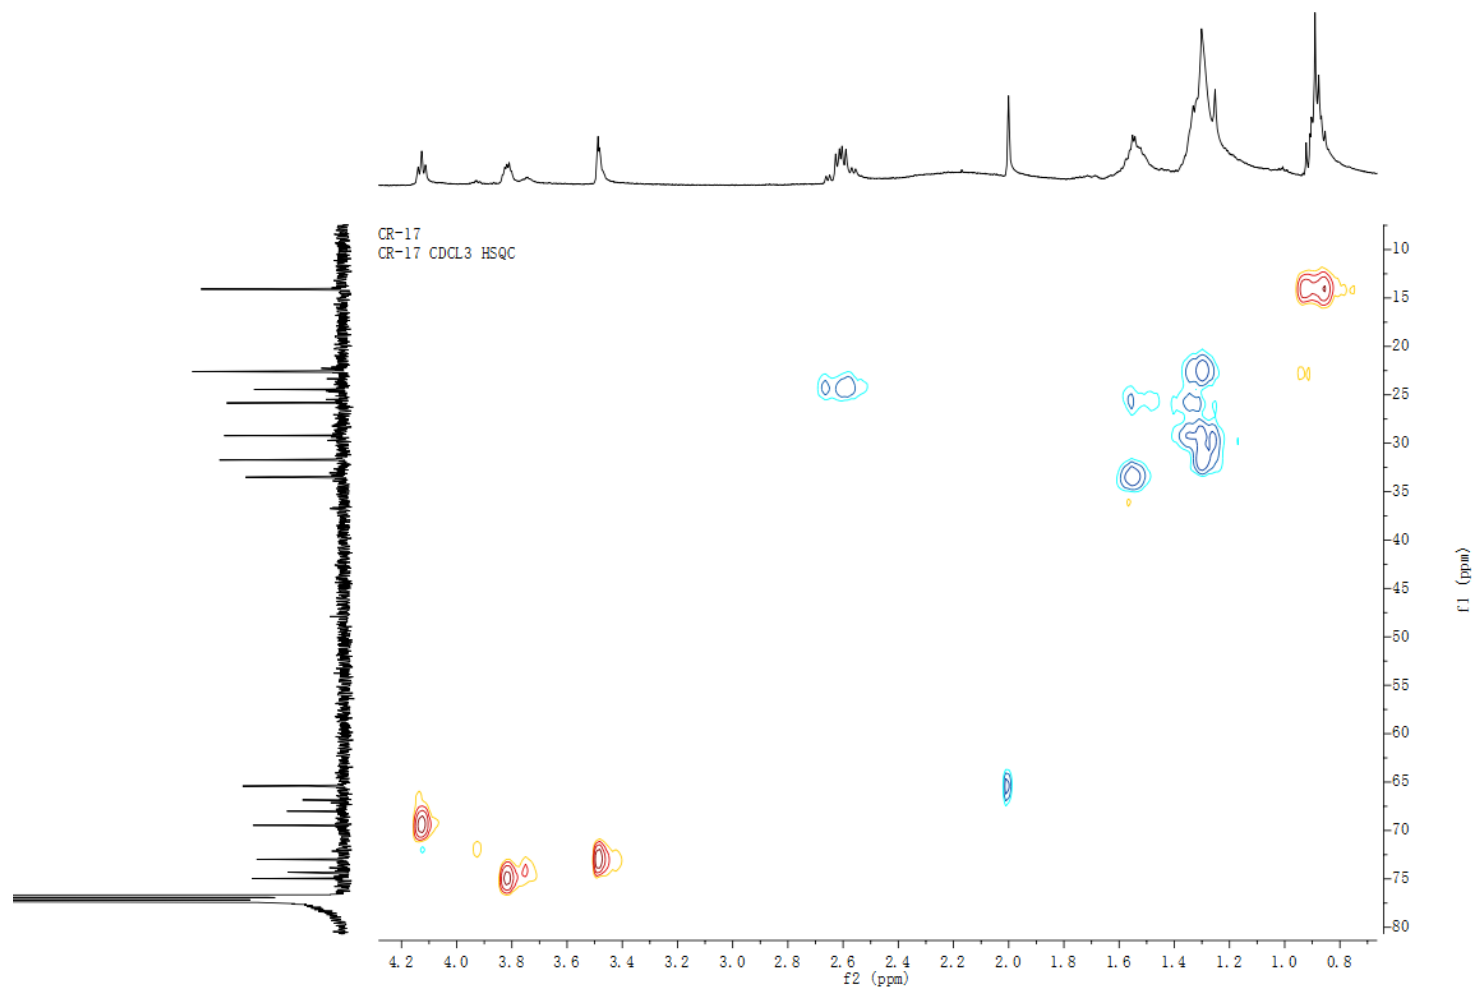

**Figure S25.** HSQC spectrum of compound **4** in CDCl<sub>3</sub>.

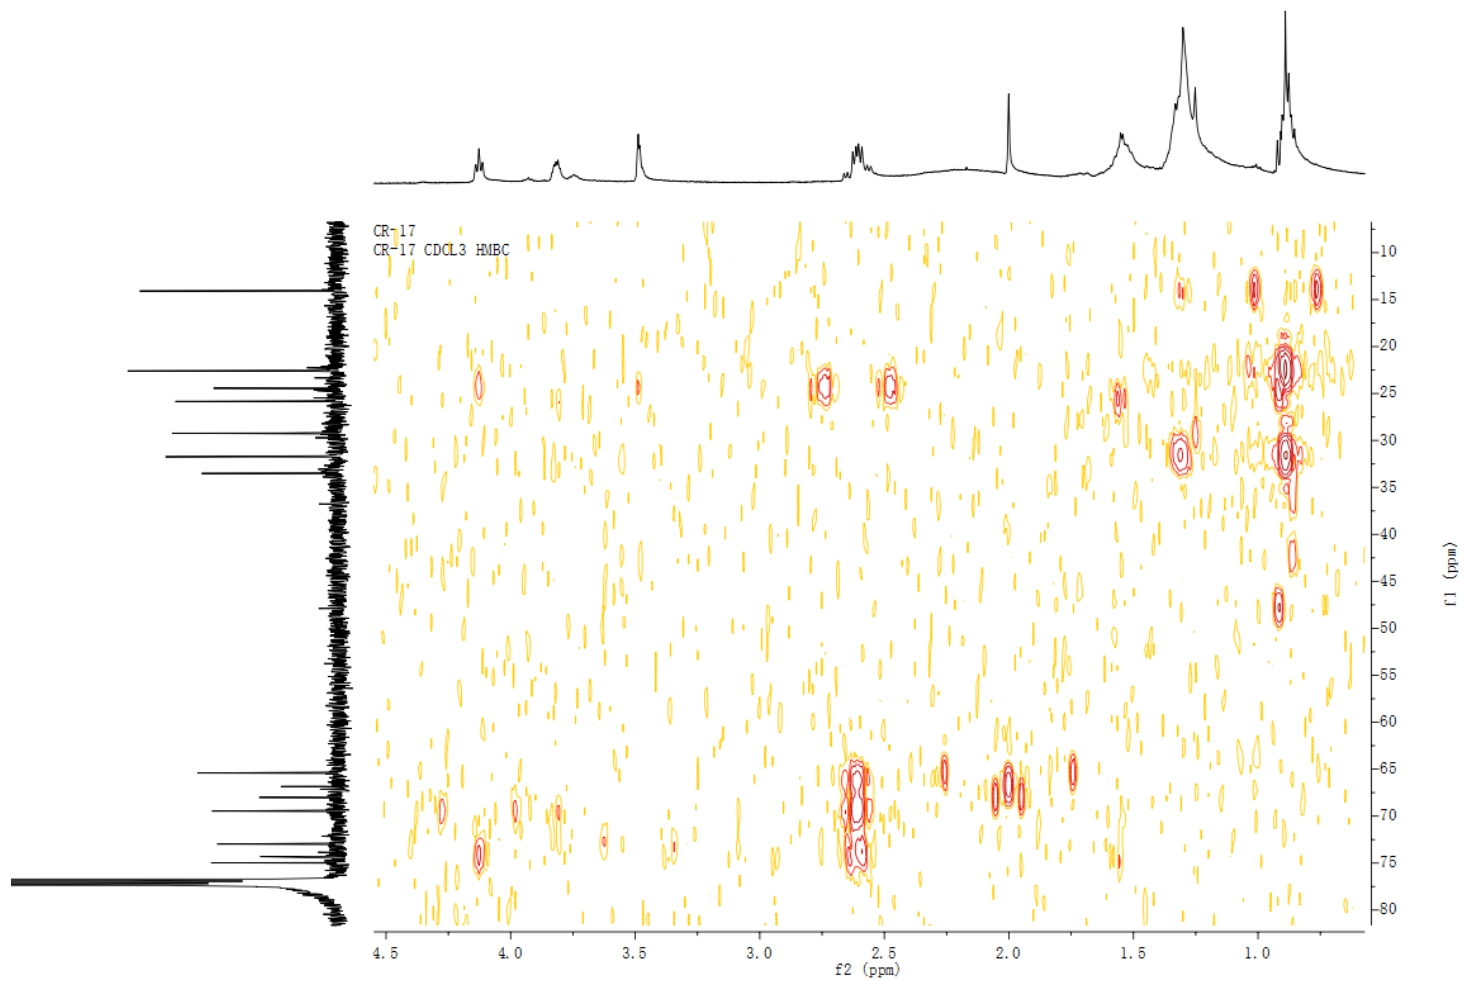

**Figure S26.** HMBC spectrum of compound **4** in CDCl<sub>3</sub>.

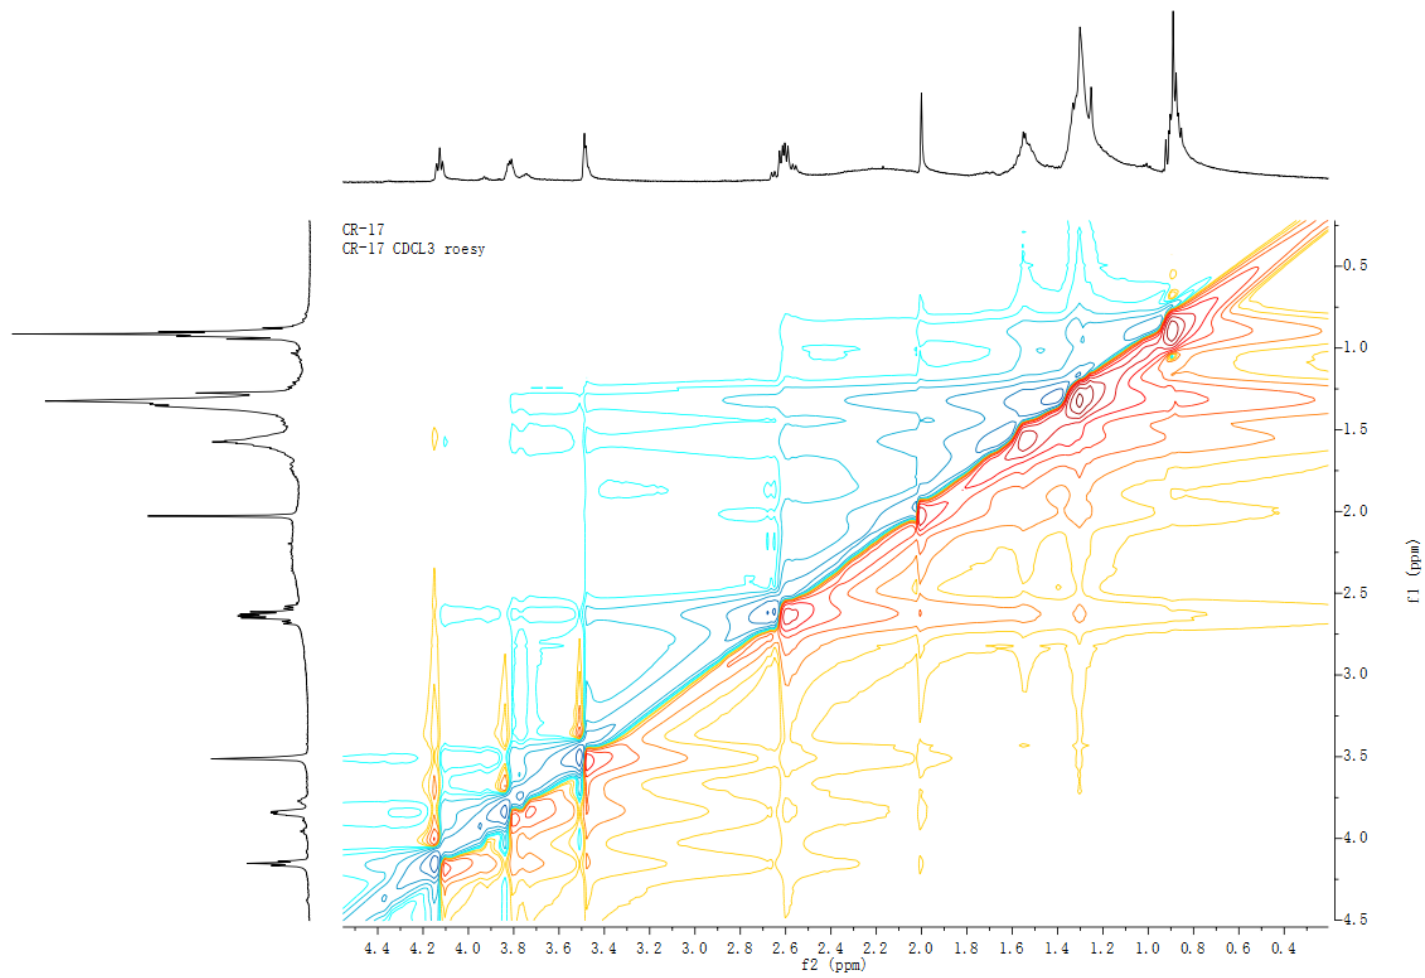

**Figure S27.** ROESY spectrum of compound **4** in CDCl<sub>3</sub>.

## Qualitative Analysis Report

|                                                   |                                           |  |
|---------------------------------------------------|-------------------------------------------|--|
| <b>Data Filename</b> 150203ESI2.d                 | <b>Sample Name</b> CR-17                  |  |
| <b>Sample Type</b> Sample                         | <b>Position</b>                           |  |
| <b>Instrument Name</b> Agilent G6230 TOF MS       | <b>User Name</b> KIB                      |  |
| <b>Acq Method</b> ESL.m                           | <b>Acquired Time</b> 2/3/2015 11:07:25 AM |  |
| <b>IRM Calibration Status</b> Success             | <b>DA Method</b> ESL.m                    |  |
| <b>Comment</b>                                    |                                           |  |
| <b>Sample Group</b> Info.                         |                                           |  |
| <b>Acquisition SW</b> 6200 series TOF/6500 series |                                           |  |
| <b>Version</b> Q-TOF B.05.01 (B5125.2)            |                                           |  |

### User Spectra

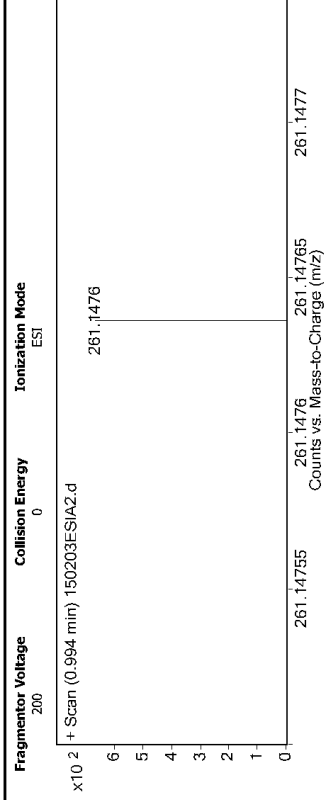

### Peak List

| m/z       | z | Abund     |
|-----------|---|-----------|
| 121.0509  | 1 | 219630.8  |
| 122.0528  | 1 | 12863.49  |
| 135.0662  |   | 6055.44   |
| 274.2737  | 1 | 10609.1   |
| 318.2994  | 1 | 8079.25   |
| 922.0098  | 1 | 324422.59 |
| 923.0119  | 1 | 54759.75  |
| 924.0141  | 1 | 6479.02   |
| 1821.9503 | 1 | 17132.29  |
| 1941.9912 | 1 | 7572.69   |

### Formula Calculator Element Limits

| Element | Min | Max |
|---------|-----|-----|
| C       | 0   | 200 |
| H       | 0   | 400 |
| O       | 0   | 5   |
| Na      | 1   | 1   |

### Formula Calculator Results

| Formula       | CalculatedMass | CalculatedMz | Mz       | Diff. (mDa) | Diff. (ppm) | DBE    |
|---------------|----------------|--------------|----------|-------------|-------------|--------|
| C14 H22 Na O3 | 261.1467       | 261.1461     | 261.1476 | -1.5        | -5.8        | 3.5000 |

--- End Of Report ---

**Figure S28.** HRESI(+)MS spectrum of compound **4**.

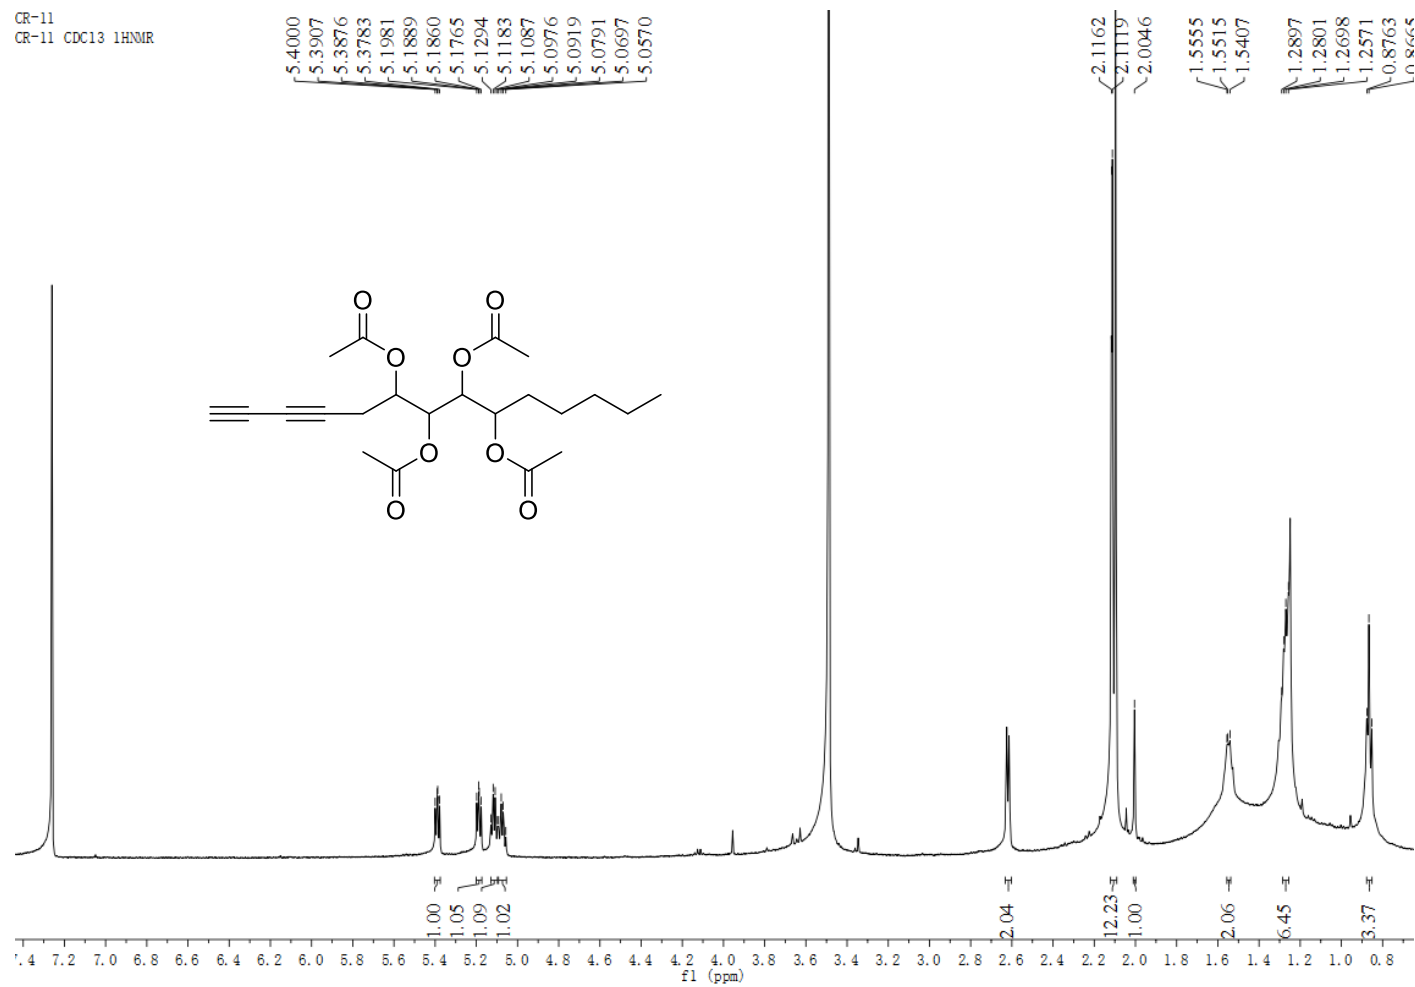

**Figure S29.** <sup>1</sup>H NMR spectrum (500 MHz) of compound **5** in CDCl<sub>3</sub>.

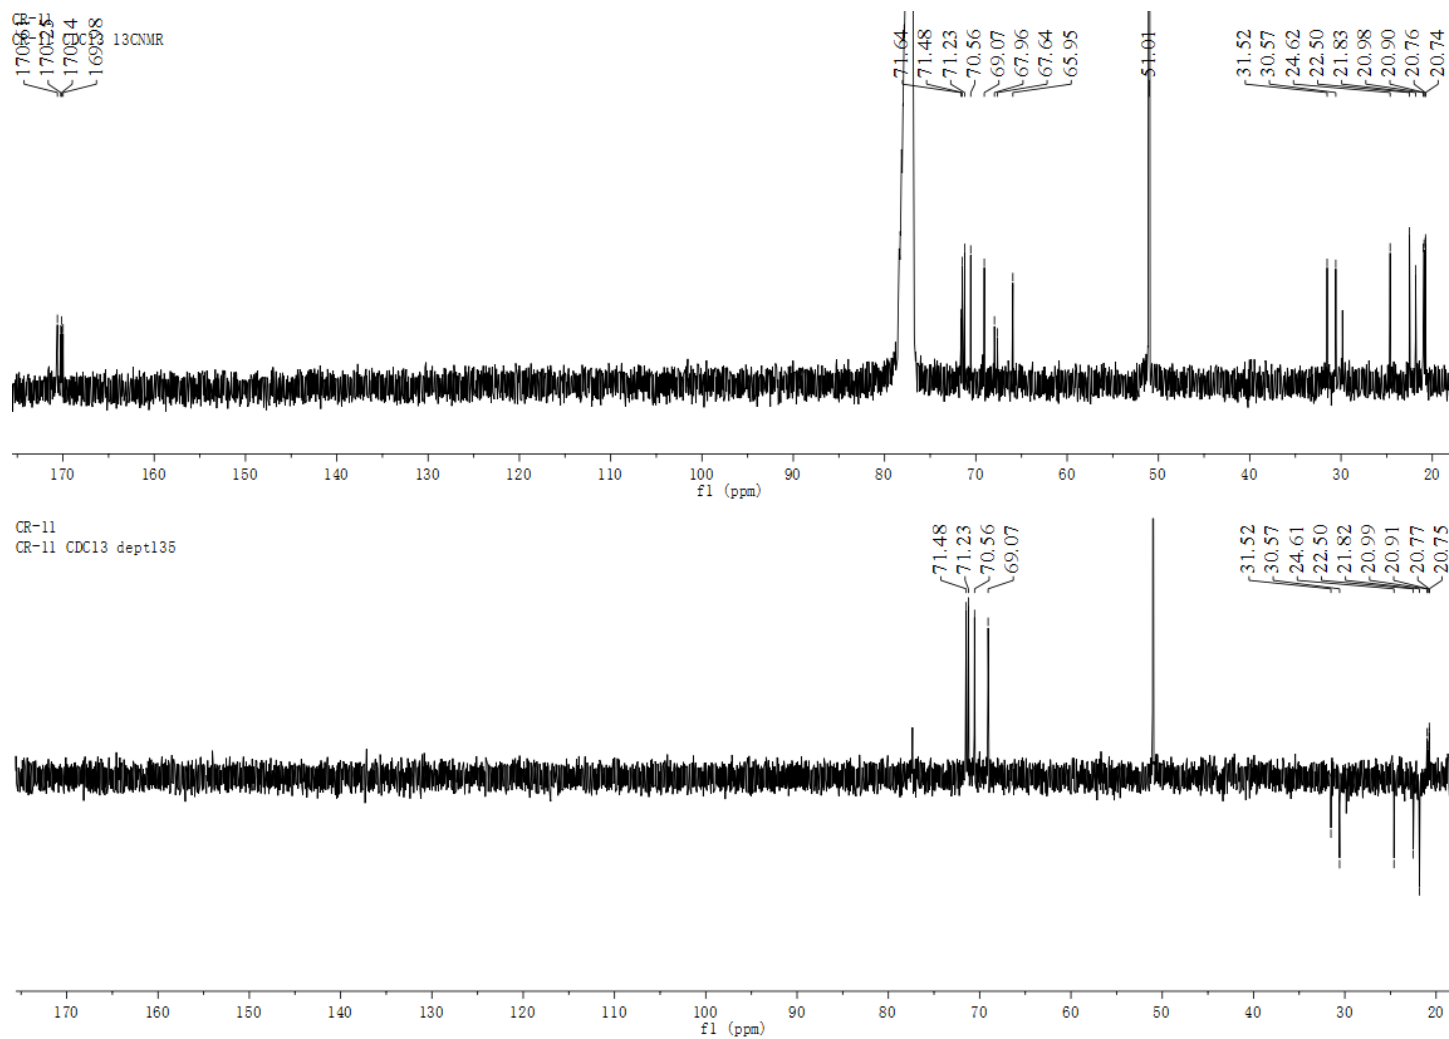

Figure S30. <sup>13</sup>C NMR spectrum (125 MHz) of compound **5** in CDCl<sub>3</sub>.



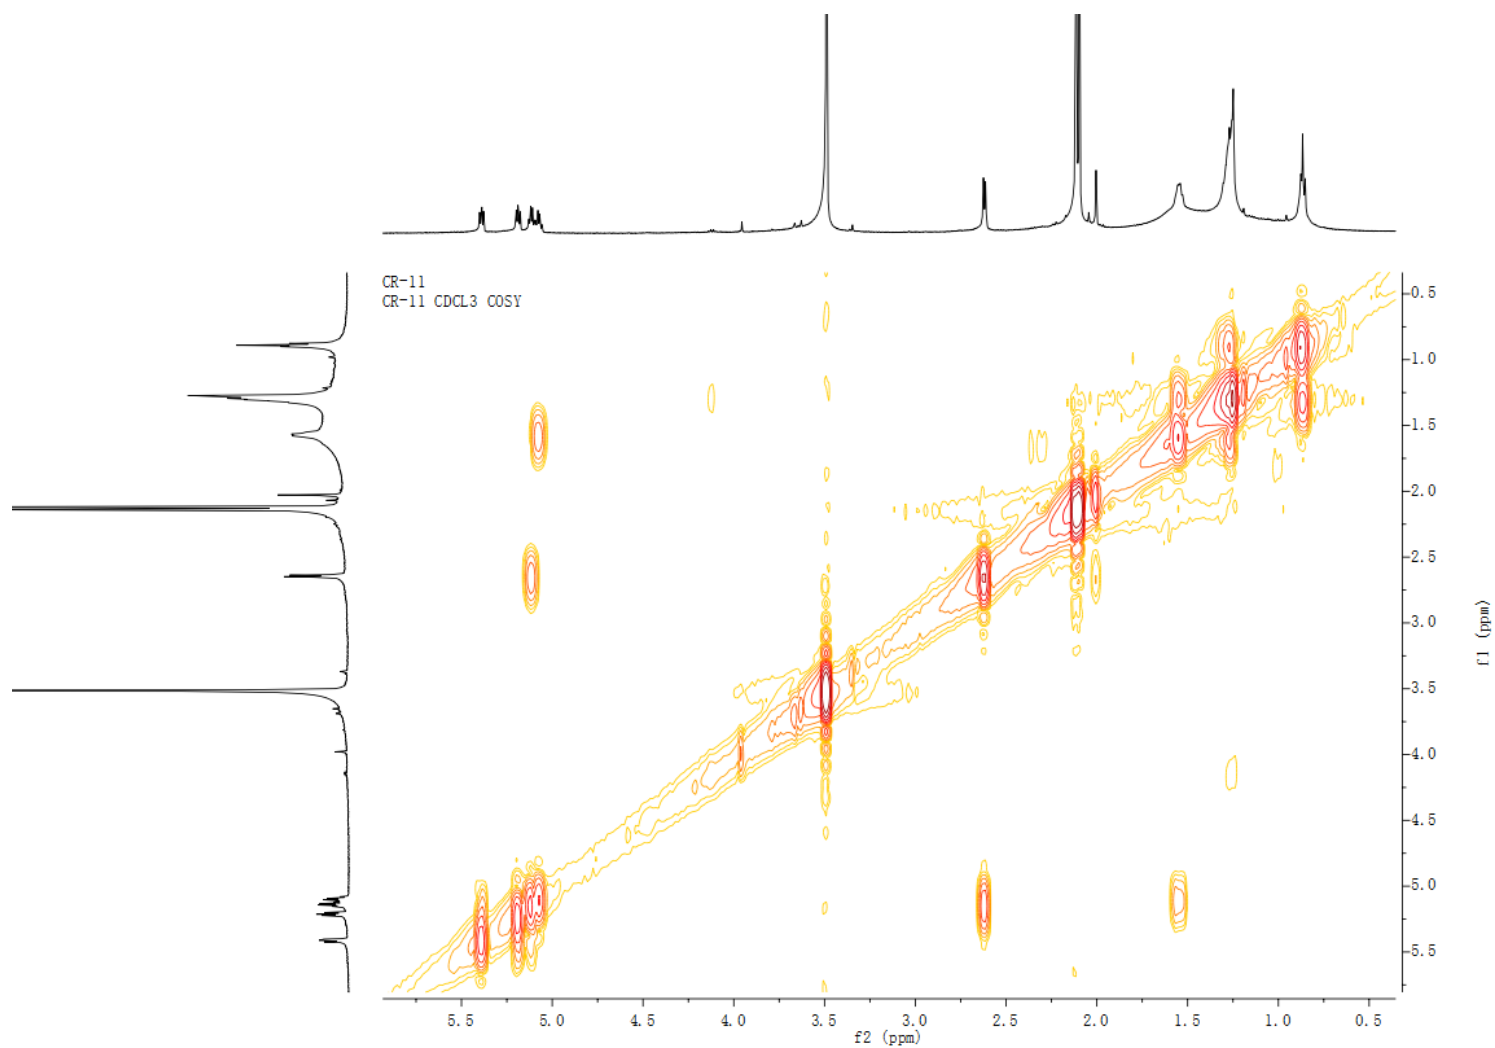

**Figure S31.**  $^1\text{H}$ - $^1\text{H}$  COSY spectrum of compound **5** in  $\text{CDCl}_3$ .

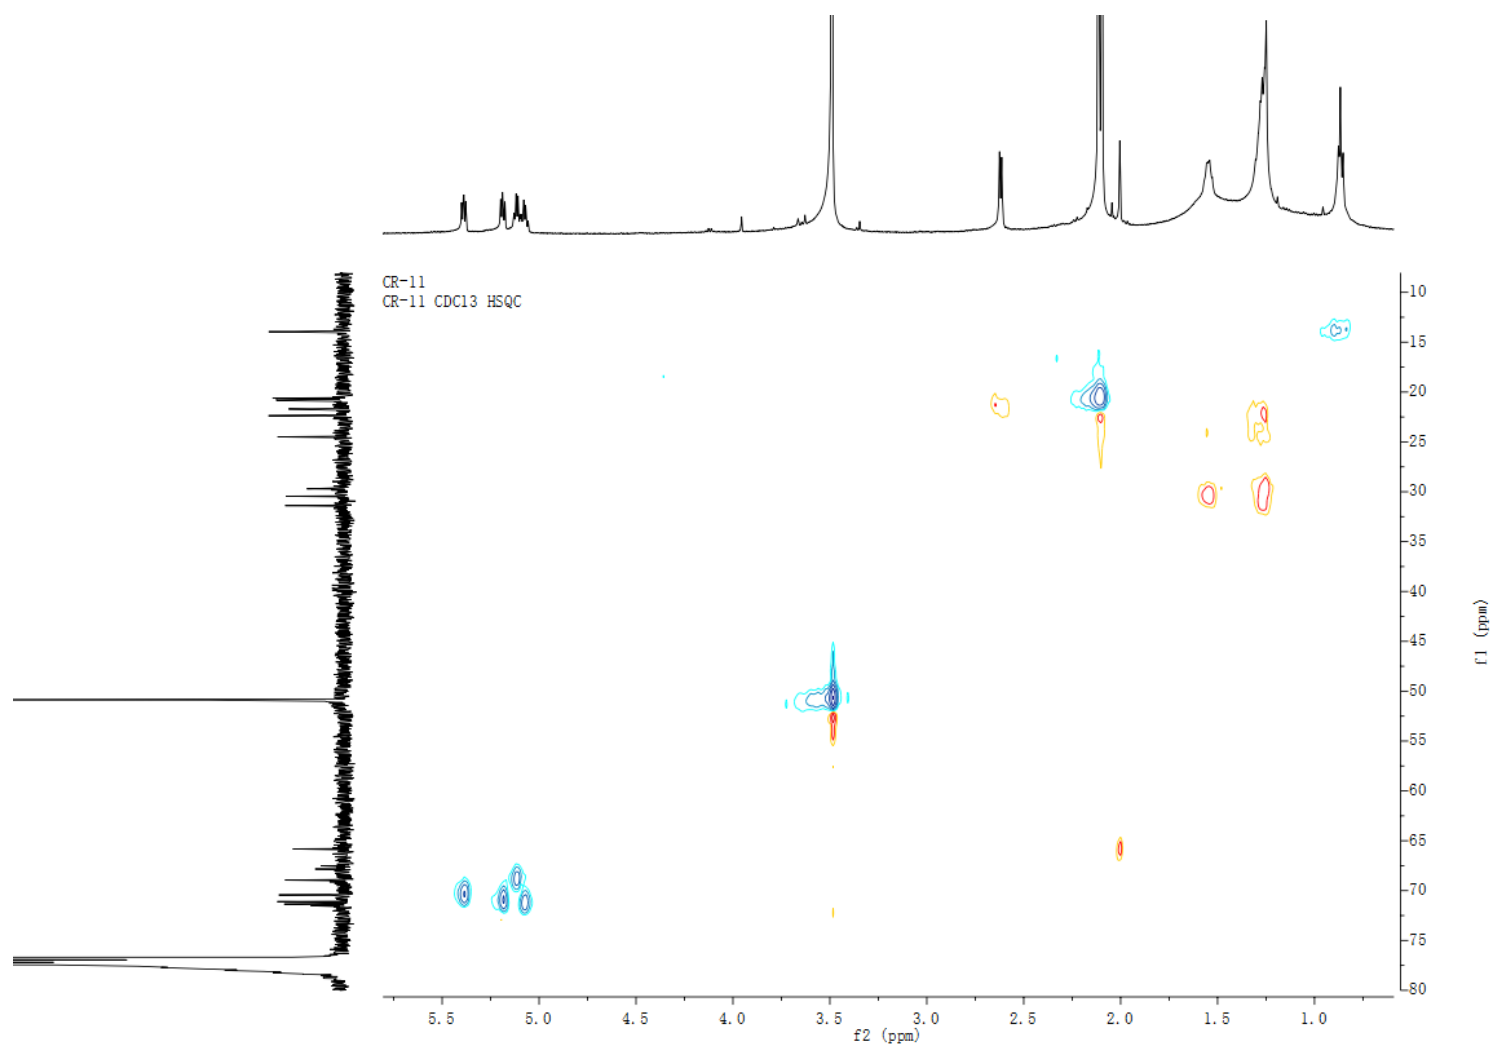

**Figure S32.** HSQC spectrum of compound **5** in CDCl<sub>3</sub>.

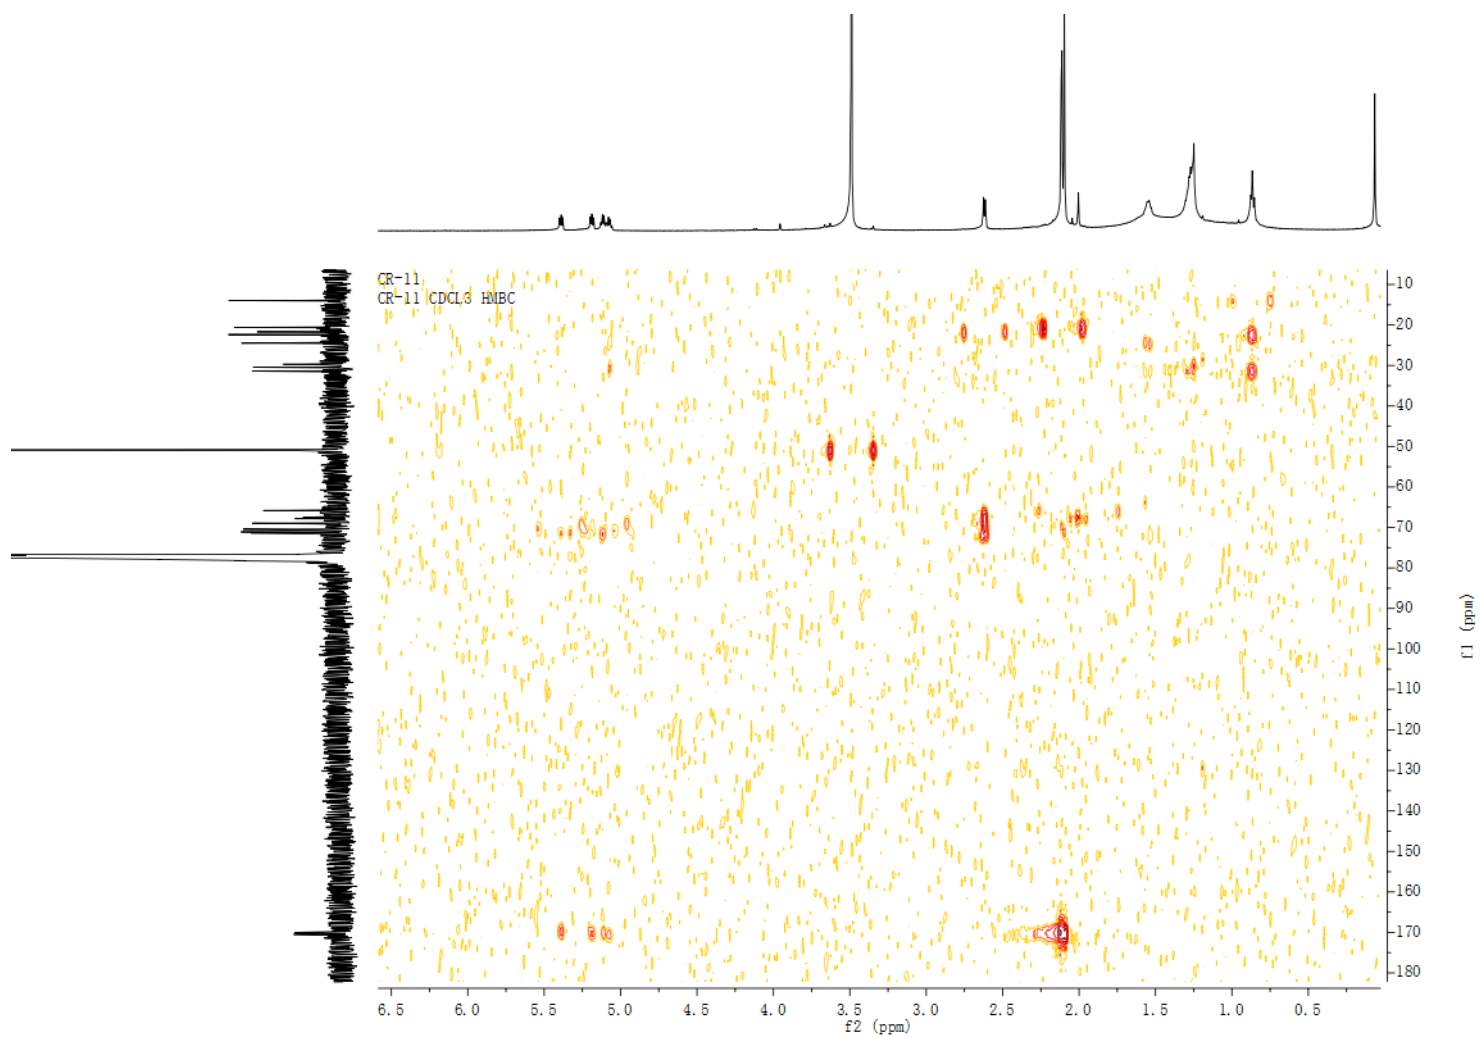

**Figure S33.** HMBC spectrum of compound **5** in CDCl<sub>3</sub>.

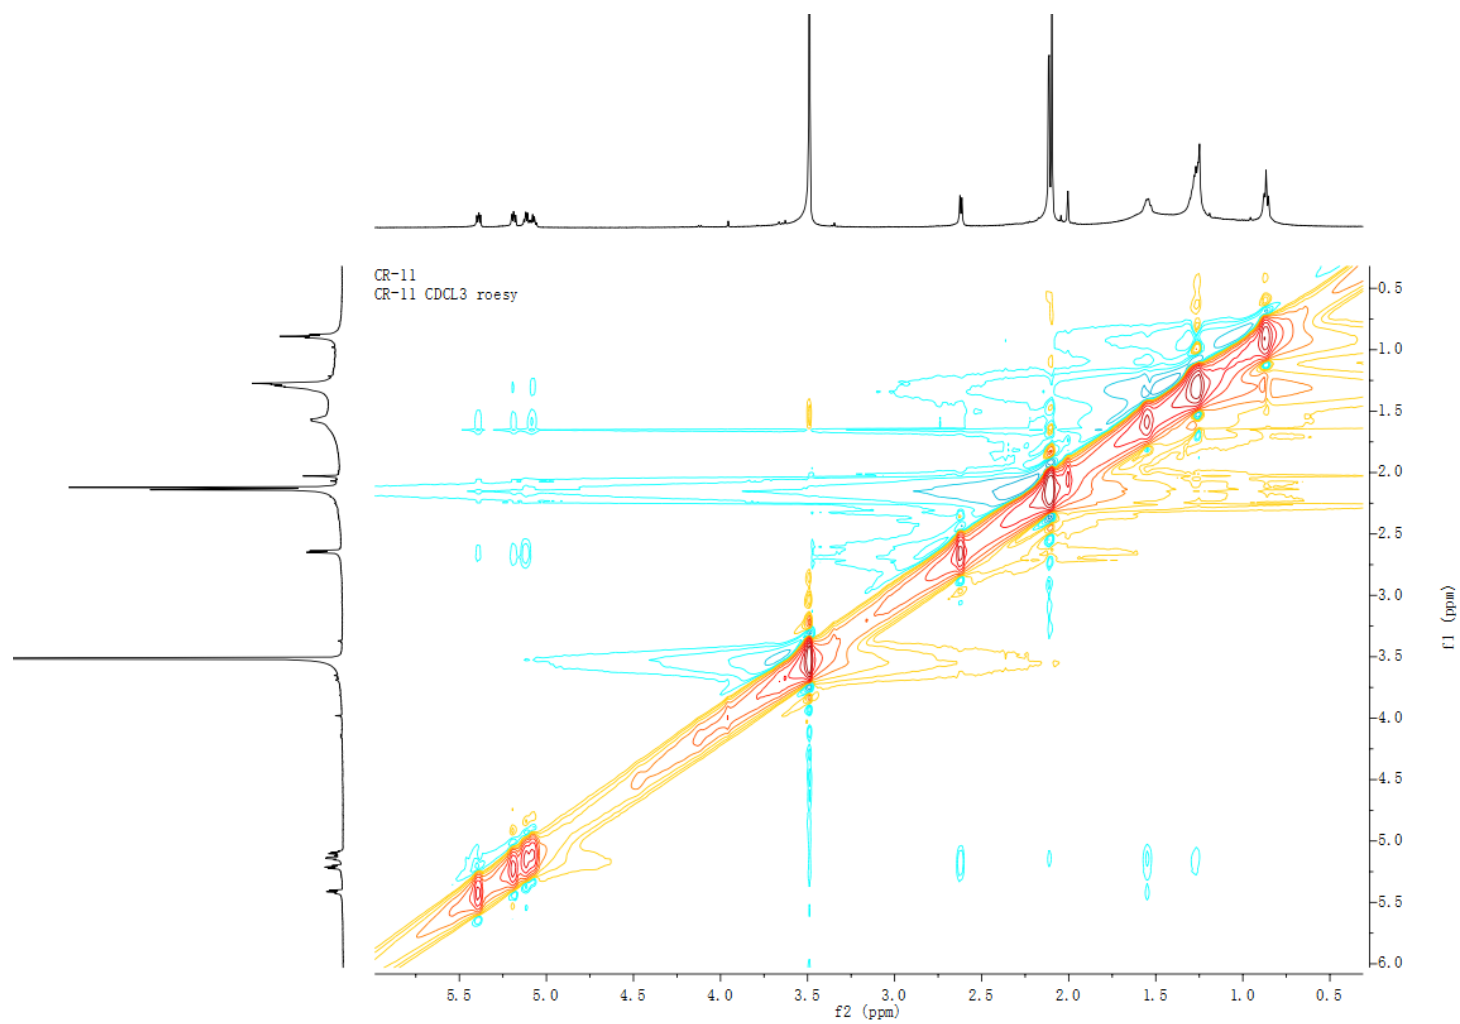

**Figure S34.** ROESY spectrum of compound **5** in CDCl<sub>3</sub>.

## Mass Spectrum SmartFormula Report

**Analysis Info**  
 Acquisition Date 2018-11-07 16:23:42  
 Analysis Name D:\Data\A501VJZ\2018.11.7\CR-11.d  
 Method DirectInfusion - MS - positive.m  
 Sample Name CR-11  
 Operator Demo User  
 Instrument compact  
 Comment 8255754.20156

**Acquisition Parameter**

|             |            |                      |          |
|-------------|------------|----------------------|----------|
| Source Type | ESI        | Ion Polarity         | Positive |
| Focus       | Not active | Set Capillary        | 4500 V   |
| Scan Begin  | 50 m/z     | Set Capillary Offset | 0 m/z    |
| Scan End    | 1300 m/z   | Set Entrance Voltage | 2000 V   |
|             |            | Set Corona           | 0 nA     |
|             |            | Set Nebulizer        | 0.4 Bar  |
|             |            | Set Dry Heater       | 180 °C   |
|             |            | Set Dry Gas Flow     | 4 l/min  |
|             |            | Set Dry Gas Source   | Source   |
|             |            | Set APCI Heats       | 0 °C     |
|             |            | Set APCI Heater      | 0 °C     |

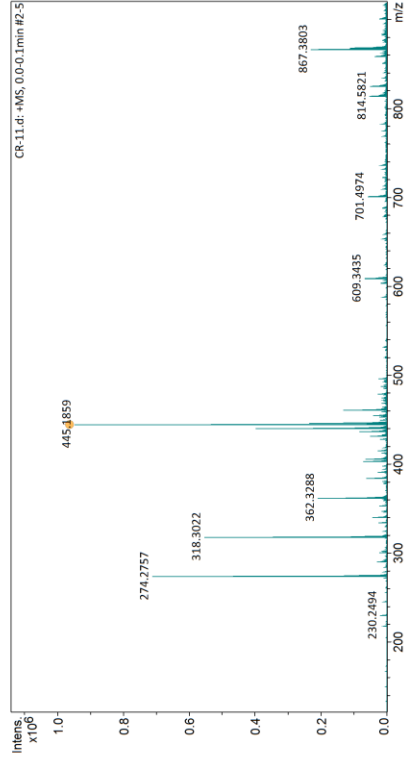

| Sum Formula | Ion Formula | Meas. m/z | m/z      | err [mDa] | err [ppm] |
|-------------|-------------|-----------|----------|-----------|-----------|
| C22H30O8    | C22H30NO8   | 445.1859  | 445.1833 | -2.6      | -5.9      |

**Figure S35.** HRESI(+)-MS spectrum of compound 5.
